1 **Title:** A GT-seq panel for walleye (*Sander vitreus*) provides a generalized workflow for efficient  
2 development and implementation of amplicon panels in non-model organisms.

3

4 **Running head:** A guide to develop and implement GT-seq SNP panels

5

6 **Authors:** Matthew L. Bootsma<sup>1\*</sup>, Kristen M. Gruenthal<sup>2</sup>, Garrett J. McKinney<sup>3</sup>, Levi Simmons<sup>1</sup>,  
7 Loren Miller<sup>4</sup>, Greg G. Sass<sup>5</sup>, Wesley A. Larson<sup>6</sup>

8

9 **Affiliations**

10 <sup>1</sup> Wisconsin Cooperative Fishery Research Unit, College of Natural Resources, University of  
11 Wisconsin-Stevens Point, 800 Reserve St., Stevens Point, WI 54481, USA,  
12 mbootsma@uwsp.edu, lsimm290@uwsp.edu

13 <sup>2</sup> Office of Applied Science, Wisconsin Department of Natural Resources, Wisconsin  
14 Cooperative Fishery Research Unit, College of Natural Resources, University of Wisconsin-  
15 Stevens Point, 800 Reserve St., Stevens Point, WI 54481, USA,  
16 kristen.gruenthal@wisconsin.gov

17 <sup>3</sup> NRC Research Associateship Program, Northwest Fisheries Science Center, National Marine  
18 Fisheries Service, National Oceanic and Atmospheric Administration, 2725 Montlake Blvd E,  
19 Seattle, WA 98112, USA, garrett.mckinney@noaa.gov

20 <sup>4</sup> Minnesota Department of Natural Resources, University of Minnesota, 135 Skok Hall, 2003  
21 Upper Buford Circle, St. Paul, MN 55108, USA, loren.miller@state.mn.us

22 <sup>5</sup> Escanaba Lake Research Station, Office of Applied Science, Wisconsin Department of Natural  
23 Resources, 3110 Trout Lake Station Drive, Boulder Junction, WI 54512, USA,

24 [gregory.sass@wisconsin.gov](mailto:gregory.sass@wisconsin.gov)

25 <sup>6</sup> U.S. Geological Survey, Wisconsin Cooperative Fishery Research Unit, College of Natural  
26 Resources, University of Wisconsin-Stevens Point, 800 Reserve St., Stevens Point, WI 54481,

27 USA, [wes.larson@uwsp.edu](mailto:wes.larson@uwsp.edu)

28 **\*Corresponding author**

29

30 **Keywords:** Amplicon sequencing, GT-seq, microhaplotype, parentage analysis, genetic stock  
31 identification, walleye

32

33 **Abstract (250 words or less)**

34 Targeted amplicon sequencing methods, such as Genotyping-in-Thousands by  
35 sequencing (GT-seq), facilitate rapid, accurate, and cost-effective analysis of hundreds of genetic  
36 loci in thousands of individuals. Development of amplicon sequencing panels is non-trivial, but  
37 studies describing detailed workflows of GTseq panel development are rare. Here, we develop a  
38 dual-purpose GT-seq panel for walleye (*Sander vitreus*), outline a generalized workflow for  
39 panel development, and discuss trade-offs associated with different development and genotyping  
40 approaches. Our GT-seq panel was developed using an ascertainment set consisting of restriction  
41 site-associated DNA data from 954 individuals sampled from 23 populations in Minnesota and  
42 Wisconsin, USA. We then performed simulations to test the utility of all loci for parentage  
43 analysis and genetic stock identification and designed 600 primer pairs to maximize joint  
44 accuracy for these analyses. We conducted three rounds of primer optimization to remove loci  
45 that overamplified, yielding a final panel of 436 loci. We also explored different approaches for  
46 DNA extraction, multiplexed polymerase chain reaction (PCR) amplification, and cleanup steps  
47 during the GT-seq process and discovered the following: (1) inexpensive Chelex extractions  
48 performed well for genotyping, (2) the exonuclease I and shrimp alkaline phosphatase (Exo-  
49 SAP) procedure included in some current protocols did not improve results substantially and was  
50 likely unnecessary, and (3) it was possible to PCR amplify panels separately and combine them  
51 prior to adapter ligation. Well-optimized GT-seq panels are valuable resources for conservation  
52 genetics and our workflow and findings should aid in their construction in myriad taxa.

53

54

55

## 56 **Introduction**

57           The development of genotyping-by-sequencing (GBS) methods has allowed collection of  
58 data from thousands of markers across a genome, enabling research that was not possible using  
59 traditional genetic approaches (Davey et al., 2011; Narum et al., 2013). For example, studies  
60 using thousands of markers genotyped with restriction site-associated DNA (RAD) sequencing  
61 have shown improved sensitivity for detecting inbreeding depression (Hoffman et al., 2014),  
62 increased resolution for determining complex phylogenies (Wagner et al., 2013), and allowed  
63 researchers to observe selection on introduced alleles (Bay et al., 2019). Many genetic analyses,  
64 however, can be conducted efficiently with genotypes from tens to hundreds of single nucleotide  
65 polymorphisms (SNPs) (Anderson & Garza, 2006), making more expensive approaches such as  
66 RAD-seq unnecessary (Meek & Larson, 2019). Two such analyses that have been widely used in  
67 conservation genetics and molecular ecology for decades, are parentage analysis and genetic  
68 stock identification (GSI).

69           Parentage analysis involves assigning offspring to putative parents by comparing  
70 genotypes at multiple loci, while GSI infers the natal origins of individuals by leveraging  
71 baseline allele frequency estimates from populations or reporting groups. These techniques were  
72 first conducted using allozyme markers genotyped with protein electrophoresis. Although these  
73 analyses were groundbreaking, they often lacked statistical power except in cases of highly  
74 diverged stocks or simple pedigrees. The adoption of highly variable microsatellite markers in  
75 the 1990s greatly increased statistical power, allowing these two techniques to become widely  
76 adopted (Luikart & England, 1999). Despite the advances made possible by microsatellites,  
77 problems associated with homoplasy (Garza & Freimer, 1996), locus discovery (Navajas et al.,

78 1998), and reproducibility among laboratories led researchers to explore the potential of biallelic  
79 SNPs for GSI and parentage analysis (Seeb et al., 2011).

80 Although SNPs are less powerful than microsatellites on a per marker basis, SNPs are  
81 more abundant in the genome, generally have low genotyping error rates, and can be genotyped  
82 using SNP panels capable of efficiently screening a large number of samples (Brumfield et al.,  
83 2003; Morin et al., 2004). Early SNP panels were constrained, however, in the availability of  
84 molecular markers suitable for genotyping and genotyping costs associated with 5' exonuclease  
85 chemistry (Seeb et al., 2011). These constraints were significantly lessened with the proliferation  
86 of next-generation sequencing (NGS) technology. For example, methods such as RADseq  
87 facilitate quick and affordable discovery of thousands of candidate loci, which can then be  
88 selected among for specific purposes.

89 As SNP discovery has become less prohibitive, methods of selecting the most  
90 informative SNPs for a given study have advanced (Storer et al., 2012). Previous research has  
91 shown that information content will vary among SNPs depending on the context within which  
92 they are applied and location within the genome (i.e. coding or non-coding regions). For  
93 example, Ackerman et al. (2011) found that SNPs under diversifying selection provide increased  
94 accuracy and precision in GSI of sockeye salmon (*Oncorhynchus nerka*) from the Copper River,  
95 Alaska. Previous studies have shown that GSI accuracy is generally positively correlated with  
96 differentiation (e.g.,  $F_{ST}$ ) and, to a lesser extent, diversity (e.g., heterozygosity) (Ackerman et al.,  
97 2011; Bradbury et al., 2011; Storer et al., 2012). Studies of SNP selection methods for parentage  
98 analysis, however, have found that high diversity is the most important attribute to consider  
99 when creating a panel (Baetscher et al., 2018). More recently, analytical techniques have shifted  
100 towards consideration of closely linked SNPs (i.e. microhaplotypes), which effectively increases

101 the diversity at a locus and has proven useful for parentage and GSI tests (Baetscher et al., 2018;  
102 McKinney, Seeb, et al., 2017; Reid et al., 2019). While genotyping microhaplotypes would  
103 require independent assays for each SNP at a locus using previous 5' exonuclease methods, NGS  
104 technology has enabled the joint genotyping of multiple SNPs within single reads, making  
105 microhaplotype data easily obtainable through a simple modification in analytical approach.

106 One recently developed GBS method that improves upon previous high-throughput  
107 genotyping technologies, such as 5' exonuclease chemistry, is Genotyping-in-Thousands by  
108 sequencing (GT-seq). This method enables genotyping hundreds of SNPs in thousands of  
109 individuals on a single NGS lane through the use of highly-multiplexed polymerase chain  
110 reaction (PCR) (Campbell et al., 2015). GT-seq does not require an allele-specific probe, can  
111 genotype multiple SNPs within an amplicon using a single primer pair, and is substantially less  
112 expensive than 5' exonuclease chemistry, especially in the context of genotyping thousands of  
113 individuals.

114 Despite its benefits, GT-seq is not yet widely used outside of salmonids. Early  
115 applications to non-model organisms, however, have shown great promise for this method's  
116 versatility, including the ability to reveal dispersal and mating patterns in a complex environment  
117 (Baetscher et al., 2019), provide insight to the ecological and evolutionary dynamics of  
118 secondary contact (Reid et al., 2019), and understand population diversity in systems that are  
119 heavily influenced by climate change (Pavinato et al., 2019). Pedigree analysis in wild  
120 populations is highly dependent upon the ability to genotype large sample sizes to increase the  
121 likelihood of detecting kin relationships, toward which GT-seq is ideally suited. Moreover, GT-  
122 seq has proven capable of generating high-quality genotypes from low-quality DNA samples

123 (Natesh et al., 2019; Schmidt et al., 2019), making it a viable approach for monitoring  
124 endangered or elusive species.

125 While GT-seq panels have been developed to maximize accuracy for GSI (McKinney et  
126 al., 2019) or parentage (Baetscher et al., 2018) analyses, the potential for developing dual-  
127 purpose panels is largely unexplored. Moreover, developing GT-seq panels is a relatively  
128 involved task and, to this point, there are limited resources providing standardized workflows  
129 and guidelines for efficient panel construction (Campbell et al., 2015; McKinney et al., 2019).  
130 For example, there are many decision points in panel development related to primer selection,  
131 multiplexing approaches, laboratory protocols, and analysis parameters that have yet to be  
132 addressed. We used walleye (*Sander vitreus*) from Minnesota and Wisconsin, USA, as a test case  
133 to investigate various tradeoffs associated with GT-seq panel development and optimization and  
134 leveraged our collective experience to provide guidelines for researchers developing GT-seq  
135 panels.

136 Walleye are an apex predator and one of the most prized sportfish throughout their native  
137 and introduced range. Recently, many walleye populations have declined across the Midwestern  
138 United States (Embke et al., 2019; Hansen et al., 2015; Rypel et al., 2018), prompting increases  
139 in stocking efforts relative to already large and long-term regional stocking programs that have  
140 existed for decades. Genetic studies have been used to guide these efforts by informing  
141 broodstock selection and general stocking practices. Genetic variation in walleye from this  
142 region was first characterized by Fields et al. (1997), who found geographic-based patterns of  
143 genetic structure, but limitations related to sample size and molecular marker choice resulted in  
144 the use of contemporary watershed boundaries as genetic management units. This research was  
145 later expanded upon by Hammen and Sloss (2019), who attempted to further define genetic

146 structure in the Ceded Territory of Wisconsin, approximately the northern third of the state, and  
147 test whether significant genetic structure existed between distinct hydrological basins within this  
148 region. Once again, constraints associated with available molecular markers used in a system  
149 with not only low differentiation, but also extensive stocking precluded definition of fine-scale  
150 structure. This system provides an excellent model for applying genomic techniques to  
151 discriminate populations and evaluate hatchery programs using parentage analysis.

152 Like many intricacies of genomics research, GT-seq panel development is a process that  
153 is at once broadly generalizable to non-model organisms and highly specific to the taxa it is  
154 applied to. While the overarching steps (Fig. 1) will remain constant, there are many decision  
155 points within that will require informed thought and decision. Using walleye, a species with few  
156 well-established genomic resources, as a model, we examined the methods inherent to GT-seq  
157 panel development in a manner that identifies critical decision points in the process and  
158 illuminates the nuances associated with them. Our overarching goal was to design a dual-purpose  
159 GT-seq panel optimized for parentage analysis and GSI in walleye. The creation of this panel  
160 allowed us to address the following specific objectives: (1) investigate the tradeoffs between  
161 choosing markers for parentage analysis versus GSI, (2) explore the most efficient way to design  
162 an optimized panel, and (3) evaluate various laboratory approaches to maximizing the efficiency  
163 of GT-seq genotyping. We provide an in-depth discussion of our experiences designing the panel  
164 and outline important topics that should aid researchers in designing future GT-seq panels.

## 165 **Materials and Methods**

### 166 *Sample collection*

167 Tissue samples were collected from adult walleye from 23 inland lakes across Wisconsin,  
168 Minnesota, and the St. Louis River (border water) (Fig. 2a, Table 1) and stored in 95% ethanol



169 until DNA extraction. We obtained samples from as many major drainages as possible across the  
170 two states, with an emphasis on the Wisconsin and Chippewa River drainages in Wisconsin,  
171 which were difficult to differentiate using microsatellites (Hammen & Sloss, 2019); in  
172 Minnesota, sampling focused primarily on major sources of wild broodstock for stocking  
173 programs. Samples were collected by the Wisconsin and Minnesota Departments of Natural  
174 Resources using fyke nets or electrofishing. Sampling took place during the spring spawning  
175 runs of April 2015 and 2017 and fall surveys in August and September of 2015 and 2017.  
176 Stocked individuals may be tagged, or fin clipped; we inspected all sampled individuals for tags  
177 or fin clips to avoid as many individuals as possible that were of stocked origin as possible.

#### 178 *Preparation of RAD sequencing libraries*

179 Genomic DNA was extracted in a 96-well format with Qiagen DNeasy Blood and Tissue  
180 Kits. Extracted DNA was quantified using a Quant-iT PicoGreen dsDNA Assay Kit (Invitrogen,  
181 Waltham, MA) and normalized to 20ng/μl. DNA was then prepared for RADseq library  
182 preparation following the BestRAD protocol (Ali et al., 2016). Briefly, DNA was digested in a 2  
183 μl reaction with the restriction enzyme *SbfI*, and biotinylated barcode adaptors were ligated to  
184 the 5' cut ends. DNA shearing was conducted using a 12.5 μl fragmentase reaction. Library  
185 preparation was conducted using an NEBNext Ultra DNA Library Prep Kit for Illumina (NEB,  
186 Ipswich, MA), with a 12-cycle PCR enrichment. RAD library quality was inspected on a 2%  
187 agarose gel before undergoing a final AMPure XP (Beckman Coulter, Indianapolis, IN)  
188 purification and quantification on a Qubit 2.0 Fluorometer (ThermoFisher Scientific, Waltham,  
189 MA). Libraries were sequenced using paired-end (PE) 150 technology on a HiSeq 4000  
190 (Illumina, San Diego, CA) at the Michigan State University Genomics Core Facility or

191 Novogene Corporation, Inc. (Davis, CA). Sequencing was conducted to achieve a target of over  
192 one million retained reads per individual.

### 193 *Analysis of RAD data to discover SNPs*

194 Loci were identified and genotyped in STACKS v.2.2 (Rochette et al., 2019) without  
195 using gapped alignments. Raw reads were demultiplexed and barcodes were trimmed in  
196 *process\_radtags* (parameter flags: *-e SbfI, -c, -q, -filter\_illumina, -r, --bestrad*). RAD-tags were  
197 assembled into putative RAD loci with *ustacks* using the bounded model (*bound\_high = 0.05, --*  
198 *disable-gapped*) and allowing for a maximum of three nucleotide mismatches (*-M = 3*) and four  
199 stacks per locus (*-max\_locus\_stacks = 4*), as well as a minimum depth of three (*-m = 3*). The  
200 calling of haplotypes from secondary reads was disabled (*-H*). A catalog of consensus loci was  
201 assembled in *cstacks* using the two individuals with the highest number of retained reads from  
202 each population, allowing a maximum of three mismatches between sample loci (*n = 3, --*  
203 *disable-gapped*). After matching all samples against the catalog in *sstacks* (*--disable-gapped*),  
204 data were oriented by locus with *tsv2bam*, and individual genotypes were called in *gstacks*, with  
205 paired-end reads incorporated. Genotypes were exported in variant call format (vcf) using  
206 *populations*, with loose filtering parameters (SNPs present at > 5% of individuals, minimum  
207 minor allele frequency of > 0.005).

208 Comprehensive filtering of individuals and genotypes was conducted in *vcftools* v0.1.15  
209 (Danecek et al., 2011) by: 1) removing individuals missing > 20% of SNP calls, 2) removing  
210 SNPs that were missing in > 20% of individuals, and 3) removing SNPs that were not in the first  
211 140 base pairs of the RAD-tag, effectively reducing the dataset to include SNPs detectable using  
212 single-read (SR) 150 sequencing to simplify downstream amplicon design; to control for  
213 genotyping error, SNPs with a minor allele count  $\leq 3$  were also removed. Putative duplicated loci

214 were identified in HDplot (McKinney, Waples, et al., 2017) ( $H > 0.5$ ,  $-7 < D < 7$ ) and removed  
215 with vcftools. Retained individuals and SNPs were used to form whitelists for input into  
216 *populations* that output a filtered vcf of multi-SNP haplotypes, which was then filtered to remove  
217 loci with more than 10 alleles and used in simulations for locus selection. We also estimated  
218 single-SNP  $F_{IS}$  across all populations using diveRsity v1.9.90 (Keenan et al., 2013) and excluded  
219 any SNPs with  $F_{IS}$  values  $> 0.2$  or  $< -0.2$  from locus selection. Additionally, loci with a SNP in  
220 the first 10 base pairs of the RAD-tag were excluded to allow room for forward primer design.

### 221 *Analysis of population structure, locus selection, and panel assessment*

222 To understand population structure in our system and ensure that selected loci could  
223 facilitate accurate parentage assignment and GSI, we evaluated patterns of genetic divergence  
224 using pairwise  $F_{ST}$  (Table S1) estimated in Arlequin v3.5.2 (Excoffier & Lischer, 2010) and  
225 constructed a dendrogram (Fig. 2b) using Nei's distance in poppr v2.8.2 (Kamvar, Tabim, &  
226 Grünwald, 2014). These analyses facilitated identification of population pairs that would be  
227 challenging to discriminate and supported historical data suggesting several populations were  
228 founded from hatchery sources located outside of their drainage basin (Escanaba Lake, Sanford  
229 Lake, and Lake Millicent in Wisconsin); these populations were removed from simulations of  
230 panel accuracy to ensure that selected loci would best represent the natural genetic patterns of the  
231 region.

232 After initial population genetic analyses, loci were selected for primer development by  
233 constructing several test panels from the RAD data and simulating assignment accuracy for  
234 parentage and GSI. Previous research suggested that choosing loci with greater genetic  
235 differentiation (e.g.,  $F_{ST}$ ) should maximize accuracy for GSI (Ackerman et al., 2011; Storer et  
236 al., 2012), while choosing loci with higher diversity (e.g., heterozygosity and number of alleles)

237 maximizes accuracy for parentage (Baetscher et al., 2018). We therefore constructed the test  
238 panels using single-SNP  $F_{ST}$  estimated in *diveRsity* v1.9.90 (Keenan et al., 2013) as well as  
239 expected heterozygosity at a multi-SNP haplotype ( $H_{E\_mhap}$ ) and the number of alleles at a locus  
240 estimated in *adegenet* v2.1.1 (Jombart & Ahmed, 2011). All simulations were conducted with  
241 genotypes coded as multi-SNP haplotypes.

242 GSI accuracy for each panel was assessed via 100% simulations implemented in *rubias*  
243 (Moran & Anderson, 2018) using the *assess\_reference\_loo* function (*mixsize* = 200, *reps* =  
244 1000). Populations were aggregated into reporting units based on hydrological basins (Table 1).  
245 Collections within a simulation were drawn from a Dirichlet distribution with all parameters  
246 equal to 10 (i.e., each simulation's prior contained approximately equal proportions of each  
247 population for the given reporting unit). Individuals were assigned to reporting groups if they  
248 had a cumulative probability of > 70%. Unfortunately, limited sample sizes in some reporting  
249 units prevented creation of separate training and holdout datasets as suggested by Anderson  
250 (2010), thus assignment accuracies presented here may be upwardly biased and would need to be  
251 reassessed more thoroughly for populations involved in an applied study.

252 Parentage simulations were run in *CKMRsim* (Anderson,  
253 <https://zenodo.org/record/820162>), which employs a variant of the importance-sampling  
254 algorithm of Anderson and Garza (2006) that allows for more accurate estimates of very small  
255 false-positive rate (FPR: per-pair rate of truly unrelated individuals being inferred as related)  
256 relative to those obtained using standard Monte Carlo methods (Baetscher et al., 2018).

257 Parentage analyses were conducted following the methods of Baetscher et al. (2018), whereby  
258 log-likelihood ratios between a tested relationship and the hypothesis of no relationship are  
259 computed from the calculated probabilities of genotype pairs for related individuals simulated

260 from allele frequency estimates. Distributions of simulated log-likelihood ratios are then used to  
261 compute FPRs. Using this approach, we estimated FPRs for parent-offspring (PO), full-sibling  
262 (FS), and half-sibling (HS) relationships at false-negative rates (FNR: per-pair rate of truly  
263 related individuals being inferred as unrelated) ranging from 0.01 to 0.1.

264 Panels of 600 unique loci were iteratively selected, choosing loci based first on rank  
265  $F_{ST}$  then rank  $H_{E\_mhap}$ , and their utility was tested by conducting GSI tests and parentage  
266 simulations. We ultimately defined three panels of 600 loci that best described the tradeoffs  
267 between markers selected based on  $F_{ST}$  and heterozygosity. Loci in these panels were chosen by  
268 selecting 1) the top 600 loci based on  $F_{ST}$ , 2) the top 300 loci based on  $F_{ST}$  and 300 based on  
269  $H_{E\_mhap}$ , and 3) the top 600 loci based on  $H_{E\_mhap}$ . These panels are hereafter referred to as  
270  $F_{ST\_600}$ , *Composite\_600*, and *Diversity\_600*, respectively. Through further testing, we determined  
271 that a variation of the *Composite\_600* panel, with 250 loci based on  $H_{E\_mhap}$  and 350 loci based on  
272  $F_{ST}$ , delivered optimal performance for GSI and parentage analyses and proceeded to design  
273 primers for the selected loci.

#### 274 *Primer Design*

275 To design PCR primers for the selected loci, their consensus sequences were subset  
276 from the STACKS catalog into a FASTA file for import into Geneious Prime® 2019.1.1  
277 (<https://www.geneious.com>). The vcf file produced in the vcftools step containing all SNPs and  
278 alleles within a consensus sequence was included to ensure primers were properly designed (i.e.,  
279 should a SNP fall within a primer binding region, a degenerate nucleotide could be inserted or  
280 the primer re-designed). Primer pairs were iteratively designed, with optimal target parameters  
281 defined as a primer length of 20 bp, product size of 140 bp to facilitate genotyping with SR  
282 chemistry,  $T_m$  of 60° C, GC content of 50%, and no more than four of the same base repeated

283 consecutively (i.e., poly-X repeats). Primers identified as matching one or more off-target sites,  
284 which could lead to amplification of multiple products, were redesigned. Given that not all 600  
285 candidate loci initially identified were suitable candidates for primer development, we continued  
286 to iteratively select loci and design associated primers until we reached our target of 600 loci.  
287 Unfortunately, the loci selected for primer design were based on data containing a subset of  
288 individuals with discordant encoded and true identities as a result of transposition of barcodes  
289 during demultiplexing. Despite these discrepancies, the effect was likely minor as only 8% of  
290 individuals were incorrectly assigned to reporting units prior to simulation. Simulation results  
291 shown here were conducted using corrected data.

#### 292 *GT-seq optimization*

293 GT-seq was conducted following the methods of Campbell et al. (2015), with  
294 modification to the multiplex thermal cycling conditions (95 °C hold for 15 min; five cycles of  
295 95 °C for 30 s, 5% ramp to 57 °C for 2 min, 72 °C 30 s; and 10 cycles of 95 °C for 30 s, 65 °C  
296 for 30 s, and 72 °C 30 s) and post-normalization dual-sided SPRI size-selection and purification  
297 (0.6X plus 0.4X) to further restrict the product size range (e.g., primarily toward removal of  
298 primer inter-hybridization). Final library quality control consisted of confirmation of  
299 amplification and barcoding by SYBR Green-based RT-qPCR (Stratagene Mx3005P QPCR  
300 System, Agilent, Santa Clara, CA), visualization on a 2% agarose E-Gel (Invitrogen, Carlsbad,  
301 CA), and quantification using picogreen. Libraries were then sequenced at the University of  
302 Wisconsin-Madison Biotechnology Center (UWBC) DNA Sequencing Facility on a MiSeq  
303 (Illumina) using 2 × 150 bp flowcells.

304 Demultiplexed amplicon sequencing data were processed using *GTscore v1.3*  
305 (McKinney et al., 2019). *GTscore* generates *in-silico* primer-probe sequences from a catalog of

306 loci generated in STACKS, that are then matched to amplicon sequences and call genotypes for  
307 individual SNPs as well as multi-SNP haplotypes. *GTscore* also enables separation of on-target  
308 sequence reads (i.e., reads containing both an *in-silico* primer and associated probe) from reads  
309 produced as a result of primer cross-hybridization. Primer-probe file development was  
310 accomplished with *sumstatsIUBconvert.pl* by obtaining the IUB code information for each SNP  
311 from the sumstats.tsv file produced in the STACKS pipeline, converting catalog sequences  
312 produced in the STACKS pipeline to FASTA sequences using *catalog2fasta.pl*, and merging  
313 IUB code information with the catalog.fasta using *fasta2IUB.pl*. This primer-probe file was then  
314 input for *AmpliconReadCounter.pl*, along with an individual's fastq file, to produce read count  
315 summaries of primers and probes.

316 Overall, we conducted three rounds of panel optimization to identify and remove loci  
317 that had disproportionately high amplification rates (i.e., “overamplifiers”) and ensure that our  
318 panel was capable of delivering a high proportion of on-target reads for each locus as well as  
319 homogeneous amplification rates among loci. The first round of optimization used DNA from a  
320 single walleye from Sanford Lake, WI, while the second and third rounds were conducted on  
321 subsets of 24 individuals from each of four populations (96 individuals total) originally included  
322 in the RADseq study: Delavan Lake, Medicine Lake, and the Wolf River in Wisconsin and the  
323 Pine River in Minnesota. Upon completing the final optimization, the characteristics of retained  
324 loci were compared to those of loci culled from the panel. This was done by performing a  
325 Welch's two sample t-test ( $\alpha = 0.05$ ) between the GC:AC ratio of primers that were retained and  
326 those culled and between the GC:AC ratio of DNA templates retained and culled, based on the  
327 first 140 bp of the template as this was the region in which SNPs were targeted.

328 GT-seq libraries from each round were collectively analyzed for PCR accuracy  
329 and uniformity. Accuracy was measured by calculating the proportion of reads containing *in-*  
330 *silico* primer sequences (total reads) relative to those that also contained *in-silico* probes.  
331 Uniformity of amplification among loci was determined by calculating the proportion of total  
332 reads that were allocated to the top 10% of loci, based on locus read counts (`prop_reads_T10`); if  
333 amplification was perfectly uniform across loci, we would expect `prop_reads_T10` to account for  
334 exactly 10% of total reads. Given that amplification rates vary substantially within a panel, we  
335 compared among locus performance by plotting the relative  $\log_{10}$  abundance of total and on-  
336 target reads at each locus in descending order, which facilitated visual identification of  
337 overamplifiers. As among-locus amplification rates evened out after the first optimization, the  
338 on-target proportion of reads at each locus became a factor in retaining or excluding loci during  
339 the second optimization.

#### 340 *Testing methodological modifications and performance analysis*

341 During panel optimization, we compared the quality of GT-seq libraries prepared  
342 from DNA extracted with Qiagen DNeasy and a more cost-effective chelating resin-based  
343 procedure. Performance of libraries was compared using Bonferroni corrected ( $\alpha = 0.016$ )  
344 Tukey's HSD for the number of on-target reads and the proportion of total reads that were on-  
345 target, after determining whether significant differences existed among libraries via a one-way  
346 ANOVA ( $\alpha = 0.05$ ). DNA was extracted from the 96 test individuals twice, first using Qiagen  
347 DNeasy and again with a 10% Chelex 100 (200-400 mesh; Bio-Rad, Hercules, CA) solution  
348 containing 1% each of Nonidet P-40 and Tween 20 (Millipore Sigma, St. Louis, MO).  
349 Additionally, we aimed to further reduce the cost per sample by evaluating the need for certain  
350 library preparation steps. Specifically, we compared results with and without the exonuclease I



351 and shrimp alkaline phosphatase (ExoSAP) procedure included in Campbell et al. (2015) to  
352 remove PCR inhibitors and free nucleotides. GT-seq was therefore conducted on all individuals  
353 in triplicate: 1) Qiagen with ExoSAP, 2) Chelex with ExoSAP, and 3) Chelex without ExoSAP,  
354 and all tests were sequenced on the same MiSeq lane. Finally, we tested whether the number of  
355 loci that could be genotyped simultaneously could be increased by conducting multiple PCRs.  
356 We accomplished this by dividing our optimized primer panel into two non-overlapping primer  
357 pools before multiplex PCR amplification. We then merged PCR products from the separate  
358 pools prior to the barcoding PCR. The sequencing performance of this joint panel was then  
359 compared to the single multiplex containing the full panel using a Welch's two sample t-test ( $\alpha =$   
360 0.05).

361 We examined genotype concordance between RADseq and GT-seq across GT-seq  
362 read depths using the fully optimized panel in the third round. Genotypes were called using  
363 *PolyGen* (McKinney et al., 2018), an extension of the *GTscore* pipeline that uses the same  
364 maximum-likelihood algorithm as STACKS v1 for diploid, bi-allelic loci. Because low read  
365 depths can lead to high estimates of genotyping error, thereby increasing rates of allelic dropout  
366 (Catchen et al., 2013), genotypes were only compared if they had greater than 60 $\times$  coverage in  
367 RADseq. We then modeled the relationship between GT-seq read depth and genotype  
368 concordance using only read depths with more than 30 genotypes to ensure that estimates of  
369 genotype concordance at a given depth had adequate sample sizes.

370 As a final proof of concept, we tested the optimized panel on a sample of 570 walleye  
371 obtained from Escanaba Lake, WI, using the methods described above to estimate the variance in  
372 read depth among loci within a pool. We retained only loci present in more than 70% of  
373 individuals and individuals genotyped at more than 70% of loci.

## 374 **Results**

### 375 *Analysis of ascertainment dataset*

376 A total of 954 individuals from 23 populations were RAD sequenced, with an average of  
377 42 individuals per population (Table 1). Sequencing yielded 1,313,358 retained reads on average  
378 per individual (range = 8,941 - 8,176,163). Initial sequence data were used to identify 682,223  
379 putative SNPs. After passing sequence data through quality filters, 839 individuals and 20,597  
380 SNPs were retained (Table S2).

381 Population estimates of  $H_o$  (0.144 - 0.179), allelic richness (1.498 - 1.674), and  $F_{IS}$  (-  
382 0.050 - 0.017) were relatively similar across locations (Table 1). Populations from Minnesota  
383 had slightly lower diversity, which may be due to ascertainment bias as 14 of the 23 populations  
384 were from Wisconsin. The highest genetic differentiation was observed between populations  
385 from Minnesota and Wisconsin, with further structuring by drainage basin within each state (Fig.  
386 2b, Table S1). Structuring was higher in Minnesota, with most populations showing a relatively  
387 high degree of isolation (average  $F_{ST}$  = 0.07, Table 2). Structure in Wisconsin was shallower  
388 (average  $F_{ST}$  = 0.03, Table 2) and only loosely correlated with drainage basins. From these  
389 results, we constructed 13 reporting groups to facilitate GSI to identifiable genetic units (Table  
390 1). All the reporting groups from Minnesota contained single populations, whereas in Wisconsin,  
391 while the Rock-Fox and Wolf River groups contained single populations, the Wisconsin and  
392 Chippewa River groups each contained five populations. Some single populations in the  
393 Wisconsin and Chippewa Rivers were distinctly identifiable (e.g., Eau Claire River, Medicine  
394 Lake), but we grouped these populations within their drainage basin of origin as the panel will  
395 likely be used this way for management purposes.

### 396 *Locus selection and panel assessment*

397 GSI accuracy was similar among the three panels, with < 1% difference in average  
398 accuracy between the panel with loci chosen based solely on differentiation ( $F_{ST\_600}$ ) and the  
399 panel based solely on diversity (Diversity\_600) (Fig. 3, Table 3). Average assignment accuracy  
400 was > 90% for nine of the 13 reporting units in all panels (Fig. 3a). The remaining four reporting  
401 units had average assignment accuracies ranging from 78% to 86%. Three of these units (upper  
402 Chippewa River, WI; St. Louis River, MN/WI; and Red Lake, MN) are known to have admixed  
403 stocking histories, while the fourth, North Fork Crow River, MN, included Lake Koronis, which  
404 had the fewest individuals retained after filtering ( $n = 15$ ). Misassigned individuals from the St.  
405 Louis River, MN, and Red Lake, MN groups primarily assigned to the Pike River, MN, an  
406 unsurprising result given that fish from the Pike River contributed to the recovery of the  
407 collapsed walleye fishery in Red Lake (Logsdon et al., 2016) and fish in the St. Louis River  
408 watershed. Misassignments from the Upper Chippewa basin primarily assigned to the Upper  
409 Wisconsin basin due to the lower differentiation described previously.

410 The populations with the lowest assignment accuracies were found in the Chippewa  
411 River and Wisconsin River reporting groups (Table S3, S4, S5), particularly in northern  
412 Wisconsin near the headwaters of the Chippewa and Wisconsin River drainages, and included  
413 Big Arbor Vitae Lake ( $F_{ST\_600}$  accuracy = 74%), Manitowish Lake ( $F_{ST\_600}$  accuracy = 58%), and  
414 Turtle Flambeau Flowage ( $F_{ST\_600}$  accuracy = 63%). A large portion (> 10%) of the simulated  
415 individuals from these populations could not be assigned to any population, providing further  
416 support for the genetic similarity of these two reporting groups. A high proportion of individuals  
417 from Big Arbor Vitae Lake were assigned to Manitowish Lake (12%) and vice versa, from  
418 Manitowish Lake to Big Arbor Vitae Lake (20%). Most misassignments in the Turtle Flambeau  
419 Flowage were to Kawaguesaga Lake (16%). Populations with high misassignment rates also

420 tended to have short branch lengths in the dendrogram and were often located near the root of a  
421 clade (Fig. 2b). Furthermore, the two populations from the upper Chippewa basin (Manitowish  
422 Lake and Turtle Flambeau Flowage) had lower pairwise  $F_{ST}$  values, on average, relative to  
423 populations from the upper Wisconsin basin than they did with other populations from the upper  
424 Chippewa basin.

425 The Diversity<sub>600</sub> panel had the highest accuracy for assigning kin relationships, the  
426 Composite<sub>600</sub> panel showed intermediate performance and the  $F_{ST}$ <sub>600</sub> panel had the lowest  
427 accuracy rate (Fig. 3b, Table 3). For all panels, FPRs were  $< 10^{-20}$  for PO and FS relationships,  
428 indicating all panels would perform adequately for reconstructing most relationships in most  
429 study systems. Inter-panel performance did, however, range widely, from an FPR of  $4.68 \times 10^{-34}$   
430 for  $F_{ST}$ <sub>600</sub> to  $2.74 \times 10^{-80}$  for Diversity<sub>600</sub> panel at an FNR of 0.01. Within panels, FPR was  
431 inversely related to FNR.

432 Primers were designed using a modified Composite<sub>600</sub> panel, with 250 loci chosen  
433 based on  $H_{E\_mhap}$  and 350 chosen based on  $F_{ST}$ , as this panel delivered the best joint accuracy for  
434 GSI and kinship analyses (Fig. 3, Table 3). Of the initial 600 loci initially selected for primer  
435 design, 100 were not suitable for primer design, and thus, iterative selection of loci meeting  
436 primer design requirements was continued until the targeted number of  $F_{ST}$  and diversity markers  
437 was met.

#### 438 *GT-seq optimization*

439 Initial amplification and MiSeq sequencing of all 600 loci yielded 4,655,071 reads  
440 containing intact *i7* barcode sequences, with 4,150,910 reads (89%) matching *in-silico* primer  
441 sequences. Locus specificity was considered via the proportion of total reads that were on-target,  
442 which was 1,031,707 (24.9%) (Table 4). In terms of amplification uniformity among loci,

443 prop\_reads\_T10 accounted for 3,526,201 (85.0%) of the 4,150,910 total reads. A cutoff of 3,000  
444 reads per locus was then visually identified (Fig. 4a); loci producing more than 3,000 reads (n =  
445 123) were deemed overamplifiers and discarded prior to further optimization.

446 For the second round of optimization, the remaining 477 primers pairs produced  
447 12,653,262 reads containing intact i7 barcode sequences, and 9,347,591 (74%) matched *in-silico*  
448 primer sequences. Locus specificity improved, with 3,268,293 (35.0%) of the total reads  
449 successfully aligning to *in-silico* probe sequences (Table 4). Improvement was also observed in  
450 the uniformity of amplification across loci, with prop\_reads\_T10 equating to 72.5% (6,776,302)  
451 of total reads. Because locus performance was less variable in this round of testing, the  
452 individual on-target proportion of reads at a locus was also considered while culling undesirable  
453 loci. As such, loci visually identified as overamplifiers were again discarded if they did not  
454 display high on-target read proportions (n = 41, Fig. 4b).

455 The third GT-seq test was used to determine the functional performance of the panel and  
456 aimed to target 858 SNPs across 436 loci (Fig. 4c). This test produced 7,282,101 reads with  
457 intact i7 barcodes, and 6,827,424 (94%) matched to *in-silico* primers. Locus specificity of primer  
458 pairs improved greatly in this test, as 6,262,523 (91.7%) of the total reads were also on-target  
459 (Table 4). Likewise, the variation in amplification rates across loci decreased as evidenced by  
460 prop\_reads\_T10 decreasing to 36.6% (2,148,932) of the total reads.

461 Upon completion of panel optimization, a small but significant difference was observed  
462 between the GC content of primers that were retained (mean = 49.2%) and primers that were  
463 removed (mean = 51.4%, df = 602, t = 5.4, p < 0.001). Similar differences were found when  
464 comparing the GC content of the DNA template; significantly higher GC proportions were  
465 present in templates that were culled from the panel (mean = 47.8%) than templates that were

466 retained (mean = 45.5%, df = 359, t = 3.8, p < 0.001). Additionally, a total of 88 primer pairs in  
467 the original panel contained at least one degenerate nucleotide, 72 (81%) of which were in the  
468 forward primer. After optimization, 56 of the initial 88 (64%) were retained. In comparison, of  
469 the 512 initial primer pairs that did not have degenerate primers, 380 (74%) were retained. The  
470 average  $F_{ST}$  for the most informative SNP at a locus and the average  $H_{E\_mhap}$  did not change  
471 appreciably between the initial and fully optimized panels (Table 4).

#### 472 *Methodological modifications and performance analysis*

473         Significant differences for on-target read counts and the proportion of total reads that  
474 were on-target were detected among genomic DNA extraction and purification method  
475 combinations. Subsequent analysis using Tukey's HSD revealed that Chelex-extracted DNAs  
476 produced the highest on-target read count, and Qiagen-extracted DNAs with ExoSAP-  
477 purification produced the lowest (Fig. 5, p < 0.001). While the proportion of on-target reads did  
478 not differ between Chelex with ExoSAP and Qiagen with ExoSAP, both methods produced a  
479 significantly lower proportion of on-target reads than the Chelex-only library (Fig. 5, p < 0.001).  
480 Additionally, when comparing results from the full panel of 436 primer pairs to those obtained  
481 using the same panel divided into two unique multiplexes of 209 and 227 primer pairs (n = 436)  
482 and repooled prior to barcoding, no significant differences were found in total primer reads (df =  
483 860, t = 0.10, p = 0.92), on-target reads (df = 858, t = 0.16, p = 0.87), or the proportion of total  
484 reads that were on target (df = 806, t = 0.66, p = 0.51).

485         A total of 4,063 genotypes across 406 loci (820 SNPs) could be used in comparisons  
486 between GT-seq data and those obtained from the original RAD study. Of these genotypes,  
487 96.6% of calls were identical between methods, and modeled expectations of genotype

488 concordance (residual sum of squares = 0.02) indicated that a concordance rate of 99.0% could  
489 be expected at a GT-seq read depth of 31 (Fig. 6).

490 For a final proof of concept, a new sample of 570 walleye was sequenced using the  
491 current panel of 436 loci. After filtering, 551 individuals and 303 loci were retained with an  
492 average of 32.9 (SD = 29.1) reads per locus; 116 of the 303 loci exhibited an average coverage  
493 greater than the  $31\times$  target identified for 99.0% genotyping concordance (Fig. 7). The average  
494 percent of missing data was 6.4% (SD = 13.0%) across individuals and 30.0% (SD = 38.0%)  
495 across loci.

## 496 **Discussion**

497 GT-seq and other amplicon sequencing methods have tremendous potential for  
498 facilitating high-throughput genotyping in non-model organisms (Meek & Larson, 2019). Few  
499 published studies, however, have critically analyzed the panel development process (see  
500 McKinney et al. 2019). Here, we leverage our experiences developing a GT-seq panel for  
501 walleye with testing various aspects of the GT-seq methodological process to provide general  
502 guidelines usable by other researchers to simplify panel construction and validation, particularly  
503 in non-model species. Our walleye panel has the necessary power to conduct GSI in a study  
504 system with highly variable degrees of genetic differentiation and perturbation by historical  
505 stocking, while also being capable of identifying PO and FS relationships within large  
506 populations. The robust performance of our panel was facilitated by exploring the upper limits of  
507 how many loci a GT-seq panel can target and the trade-offs between choosing loci for GSI  
508 versus parentage analysis. The workflow presented here will aid in the efficient creation of  
509 multipurpose GT-seq panels in organisms with little to no available genomic resources.

510 *Patterns of population structure: historical stocking influences GSI accuracy*

511           The largest genetic differentiation in our data was observed between populations from  
512   Wisconsin and Minnesota; this structure was likely the result of recolonization from different  
513   refugia following the Wisconsin glaciation, which ended ~10,000 years ago. A range-wide  
514   analysis of walleye genetic structure using microsatellite loci produced similar patterns, with the  
515   most genetically independent populations found in northern Minnesota and Canada (Stepien et  
516   al., 2009). Additionally, we found that while populations in Minnesota displayed strong isolation  
517   on relatively small spatial scales, broad-scale patterns of isolation were less evident in  
518   Wisconsin. In particular, the Ceded Territory of Wisconsin, which included our Chippewa River  
519   and Wisconsin River reporting groups, displayed patchy and low genetic structure overall. It is  
520   likely that structure in this region has been compromised by stocking. Hammen and Sloss (2019),  
521   for instance, observed that several populations of walleye in the upper Chippewa were more  
522   genetically similar to populations in the upper Wisconsin than to other populations in the upper  
523   Chippewa, while nongame species in the Ceded Territory of Wisconsin displayed patterns of  
524   genetic divergence strictly associated with drainage basin boundaries (Westbrook, 2012). We  
525   also observed that four proximate populations spanning the Chippewa and Wisconsin River  
526   boundaries were nearly indistinguishable (Turtle Flambeau Flowage, Manitowish Lake,  
527   Kawaguesaga Lake, Big Arbor Vitae Lake). These populations are within 50 km of each other  
528   and are located near a state walleye hatchery in Woodruff, Wisconsin, that has historically used  
529   broodstock solely from the Wisconsin River drainage basin. It is therefore highly likely that the  
530   genetic similarity of these four populations is due to stocking. Several of the sampled  
531   populations from Minnesota also had poorly documented stocking histories yet they remained  
532   highly distinct. Genetic structure in Minnesota may have been less eroded if local, genetically



533 similar sources were used, stocking was into larger, healthier resident populations, or stocking  
534 was less intense or ended a longer time ago.

535         Despite the challenges posed by low  $F_{ST}$  and evidence of supplemental stocking altering  
536 genetic structure in some populations, the SNPs discovered here provide greatly increased  
537 resolution for defining reporting units across the Midwestern, USA. Additionally, simulations  
538 suggested that a panel of several hundred loci would be highly capable of conducting individual-  
539 based GSI for most genetic units in the region. Given the regional complexity, however,  
540 improvements to accuracy could be made by further sampling areas that have shown  
541 heterogeneous signals of genetic structure (e.g., due to stocking). For example, increased  
542 sampling effort directed at the Chippewa and Wisconsin Rivers' drainage basins could prove  
543 especially beneficial as analyzing populations in the lower reaches of each basin may provide a  
544 better understanding of signals of historical recolonization, while populations in the upper  
545 reaches (e.g., Ceded Territory of Wisconsin) could better define the effects stocking may have  
546 had. Additional samples could also serve as a holdout dataset, as suggested by Anderson (2010),  
547 to test the assignment accuracy of our panel.

#### 548 *Tradeoffs associated with choosing loci based on differentiation versus diversity*

549         We evaluated the tradeoffs associated with selecting SNPs based on differentiation or  
550 diversity and found that there was relatively little variation in GSI accuracies across panels.  
551 Markers selected based on differentiation have been shown to provide increased resolution for  
552 defining reporting groups in systems with low levels of genetic structure (Larson et al., 2014;  
553 McKinney et al., 2019). This approach has not, however, been applied to systems where stocking  
554 may be a major factor for reduced levels of population structure, such as in upper Midwestern,  
555 USA, walleye. Interestingly, we found that assignment accuracies with our smaller panels was

556 relatively similar to accuracies obtained using ~30,000 SNPs discovered with RAD-seq (data not  
557 shown). This suggests that assignment accuracy in our system may be limited more by biological  
558 realities associated with human-mediated gene flow than by the power of our genetic markers.  
559 Further increases in assignment accuracy are therefore likely to be realized through sampling of  
560 additional populations and a more refined understanding of population history as opposed to  
561 genotyping additional markers.

562         Conversely, we found that FPRs for assigning kin relationships were highly variable  
563 among panels, with the microhaplotype diversity-based panel displaying the lowest FPRs by  
564 several orders of magnitude for each kin relationship (Table 3). This contrast in inter-panel  
565 variation between GSI and kinship simulations is reflective of the variation in information  
566 content of each panel (Fig. S1), and supports previous findings that while microhaplotype  
567 information provided added benefit to both applications, the greatest increase in assignment  
568 accuracy will likely be for kinship analysis (Baetscher et al., 2018; McKinney, Seeb, et al.,  
569 2017). When attempting to target microhaplotype loci via GT-seq, attention should be given to  
570 the number of SNPs one aims to genotype within a locus, as attempting to include loci with too  
571 many SNPs may result in targeting repetitive regions that fail to amplify properly in a multiplex.  
572 The expected maximum number of alleles per locus and the degree to which loci with large  
573 numbers of alleles perturbs primer design will likely vary among taxa. We chose a cutoff of 10  
574 alleles per locus as this appeared to be a natural break point in the allele distribution for walleye;  
575 we suggest that researchers investigate this in their system and come up with a logical cutoff  
576 prior to selecting loci. Finally, while our results suggested this panel could facilitate HS  
577 identification in small systems, performing this task in large systems would likely require more

578 loci. Our tests of panel implementation suggest this could be achievable by combining PCR  
579 products from several panels within individuals prior to barcoding.

580 *Optimizing primer design and removing overamplifying loci*

581         The main objective of GT-seq primer development is to produce a single pool of primer  
582 pairs that will amplify uniformly, while retaining as many loci as possible. To achieve this, it is  
583 important to minimize heterogeneity of primer and product characteristics (e.g., primer size,  
584 product size) and to understand that the highly multiplexed PCR required by GT-seq can be  
585 complicated by hairpin- and inter-primer hybridization artifacts. To best control PCR artifacts, it  
586 is important to avoid developing primers with complimentary regions (e.g., complimentary 3'  
587 regions and self-complementarity) and apply conservative thresholds to the upper  $T_m$  of primer  
588 design parameters (Rychlik, 1993). Incorporating loci with multiple SNPs can lead to further  
589 difficulties when the ideal priming region also contains a SNP. We found that, while degenerate  
590 primers could be successfully amplified in a multiplex, they were culled during optimization at a  
591 higher rate than non-degenerate primers. Further performance benefits could be gained from  
592 examining DNA template quality beyond just the availability of priming regions, as shown by  
593 Benita et al. (2003) who found regionalized GC content of template DNA to be a predictor of  
594 PCR success. This was supported by our data, as loci removed from the panel during  
595 optimization displayed significantly higher GC content in the amplicon and primer. Finally,  
596 while GT-seq primers can theoretically be designed for a range of amplicon sizes, we suggest  
597 that researchers design panels targeting similarly sized products that can be sequenced using  
598 PE150 technology. Panels containing similarly sized and relatively short amplicons should  
599 reduce variation in amplification rates (Baetscher et al., 2018) and ensure that genotyping is

600 robust to variation in sample quality. Moreover, PE150 sequencing is common to benchtop and  
601 core facility sequencing platforms, such as Illumina® MiSeq and HiSeq.

602 In exploring the upper limits of how many loci a GT-seq panel can target, we found that  
603 the number of amplicons reliably genotyped in a single pool is highly dependent on variable  
604 rates of amplification among primer pairs during PCR and, to a lesser extent, the degree of  
605 primer specificity. Despite efforts to limit primer inter-hybridization through diligent primer  
606 design, the presence of overamplifying loci is likely inevitable during early phases of panel  
607 development. We found it best to focus primarily on the uniformity of amplification within the  
608 primer pool in early optimization steps, by removing primer pairs found to overamplify.

609 Although achieving perfect uniformity is challenging, application of strict cutoffs during initial  
610 optimization steps likely results in a final panel that is less influenced by overamplification. The  
611 importance of this was illustrated by `prop_reads_T10` reducing from 85.0% of all primer reads to  
612 36.6% after optimization. Likewise, on-target rates were greatly improved by addressing  
613 overamplification, as demonstrated by the on-target proportion of reads increasing from 24.9% to  
614 91.7% by the third test.

#### 615 *Further optimization of the GT-seq protocol*

616 Although there may be an upper as-yet-unidentified limit in the number of primers that  
617 can be included in a single primer pool, we found that the total number of loci targeted can be  
618 increased by PCR amplifying multiple primer pools separately on a sample and pooling PCR  
619 products within individuals prior to barcoding. This approach could be used to genotype multiple  
620 complementary or even independent GT-seq panels using the same primer tail systems at a small  
621 cost increase compared to genotyping a single panel, as the most expensive steps in the GT-seq  
622 protocol (e.g., DNA normalization) are only conducted once (Campbell et al., 2015). Combining

623 multiple panels could facilitate genotyping of > 1,000 loci rather than a few hundred, providing  
624 greatly increased power for kinship analysis and GSI (Baetscher et al., 2018; McKinney, Seeb, et  
625 al., 2017). Additionally, further optimization of individual panels could be conducted by  
626 manipulating the initial concentrations of primer pairs based on observed panel performance,  
627 reducing the concentration of loci that appear to overamplify. While this process would be  
628 cumbersome to perform by hand, a liquid handling robot could enable a researcher to fine-tune  
629 the performance of existing and new panels alike, thereby enhancing efficiency.

630 DNA extraction can comprise a large portion of the total cost of genetic analysis,  
631 especially for relatively affordable approaches such as GT-seq, in terms of finances and time.  
632 Extractions using chelating beads provided a cost-effective alternative to more expensive salting-  
633 out approaches, such as Qiagen DNeasy kits. Chelating extractions, however, can also produce  
634 lower quality DNA and may include suspended impurities (Singh et al., 2018). Campbell et al.  
635 (2015) did show that GT-seq can be conducted using DNA from chelating extractions but did not  
636 directly compare results using multiple extraction protocols. Here, we directly showed that cost-  
637 effective chelating extractions can produce equally high quality, if not superior, sequence data  
638 compared to more expensive methods. Although consideration should be given to the quality of  
639 tissue samples, the chelating approach appears to be a viable approach for reducing per-sample  
640 costs with GT-seq. It is important to be aware that proper laboratory technique is essential when  
641 using this method, however, as chelating beads will inhibit PCR and greatly reduce library  
642 product yields. This may be especially problematic when using a liquid handling robot that is  
643 unable to visually detect chelating beads. Therefore, we suggest researchers carefully pipette the  
644 DNA-containing supernatant from chelating resin extractions by hand into a secondary container  
645 (e.g., 96-well PCR plate) before aliquoting DNA with a robot. Finally, we found that the

646 ExoSAP procedure included in the original GT-seq protocol did not produce higher quality data  
647 and was not necessary for our purposes; removing this step from the protocol will further reduce  
648 GT-seq costs and time commitment.

649 *Suggestions for designing GT-seq studies and conclusions*

650 A major consideration when designing a GT-seq panel is deciding how large of an  
651 ascertainment dataset is necessary. We constructed a comprehensive ascertainment set with  
652 RAD-seq, which was expensive and resource intensive. Despite this, we found that the panel  
653 chosen based on diversity produced similar results to the panel chosen based on differentiation.  
654 In our case, we believe that a smaller ascertainment set of ~96 individuals sampled from across  
655 the same geographic range may have resulted in a panel of relatively similar quality. Smaller  
656 ascertainment datasets are likely sufficient when the main applications of a given GT-seq panel  
657 are kinship analysis and GSI of highly diverged populations; however, when designing GT-seq  
658 panels to differentiate closely related populations (e.g. Chinook salmon *Oncorhynchus*  
659 *tshawytscha* in western Alaska), accurate characterization of ascertainment populations is vital  
660 (Larson et al., 2014; McKinney et al., 2019).

661 Another major consideration when conducting GT-seq analysis is deciding how deep to  
662 sequence individuals. We found that a read depth of 31× could be expected to produce genotypes  
663 that were 99% concordant with those derived from RADseq. Read depths were, however, highly  
664 variable across loci; we only retained 303 of the 436 loci in our panel when we genotyped 536  
665 individuals at an average depth of 33×. We also found that a large and variable proportion of  
666 reads can be discarded prior to genotyping. Therefore, we suggest that researchers target an  
667 average depth of at least 100× to ensure that most loci in the panel can be genotyped and that all  
668 acquired genotypes are highly reliable. At this level of coverage, researchers could genotype

669 ~500 individuals with a panel of 500 loci on a single MiSeq lane (~25 million reads) and ~8,000  
670 individuals on a HiSeq lane (~400 million reads). It is possible this level of coverage is not  
671 necessary for some applications, such as GSI, but we strongly suggest obtaining high coverage  
672 for more sensitive applications that require high genotyping accuracy, such as kinship analysis.

673 Finally, researchers conducting GT-seq must consider trade-offs associated with different  
674 genotyping approaches. The two main approaches we are aware of are: (1) in-silico probe-based  
675 methods that use pattern matching to genotype specific alleles (Campbell et al., 2015; McKinney  
676 et al., 2019) and (2) alignment-based methods that call all polymorphisms in a given amplicon  
677 (Baetscher et al., 2019). A major advantage of probe-based methods is that databases of probes  
678 can be shared among laboratories, facilitating standardization. It is difficult, however, to discover  
679 new variation with these methods, whereas alignment-based methods discover new variation by  
680 default. We suggest a hybrid approach, where researchers periodically use alignment-based  
681 approaches to discover new variation and add this variation to a probe database that forms the  
682 basis of genotyping and standardizing genotyping among laboratories.

683 GT-seq is a powerful addition to the molecular ecologist's toolkit that facilitates rapid,  
684 accurate, and cost-effective genetic analysis. Yet, creating a GT-seq panel is non-trivial, and  
685 there are many considerations for maximizing the utility of this approach. We found that the  
686 greatest challenge when designing our GT-seq panel was locus-specific overamplification, and  
687 we suggest that researchers remove these loci liberally. We also found that chelating extractions  
688 without an ExoSAP step produce high-quality results, providing a lower-cost alternative to  
689 salting-out extractions. Additionally, we showed that combining multiplex PCR products from  
690 multiple panels prior to barcoding can ensure additional, potentially important, loci can be  
691 genotyped with only a moderate cost increase. Finally, we found that a relatively substantial

692 proportion of sequencing reads are lost before genotyping, and we suggest researchers target  
693 higher sequencing coverage (100×) than may apparently be necessary to ensure that GT-seq  
694 datasets are robust across loci. The GT-seq approach promises to be a mainstay of population  
695 genetics for the foreseeable future, and the guidelines and suggestions outlined here may help  
696 increase the effective use of this powerful method.

## 697 **Acknowledgements**

698 We thank field crews from the Wisconsin and Minnesota Departments of Natural Resources for  
699 collecting tissue samples. We also thank Keith Turnquist from UW-Stevens Point for assistance  
700 with laboratory analysis and Ana Ramón-Laca for advice regarding primer development. This  
701 study was funded by the United States Fish and Wildlife Service, Federal Aid in Sportfish  
702 Restoration program and the Wisconsin Department of Natural Resources. Any use of trade, firm,  
703 or product names is for descriptive purposes only and does not imply endorsement by the U.S.  
704 Government.

## 705 **References**

- 706 Ackerman, M. W., Habicht, C., & Seeb, L. W. (2011). Single-Nucleotide Polymorphisms (SNPs)  
707 under Diversifying Selection Provide Increased Accuracy and Precision in Mixed-Stock  
708 Analyses of Sockeye Salmon from the Copper River, Alaska. *Transactions of the*  
709 *American Fisheries Society*, 140(3), 865-881. doi:10.1080/00028487.2011.588137
- 710 Ali, O. A., O'Rourke, S. M., Amish, S. J., Meek, M. H., Luikart, G., Jeffres, C., & Miller, M. R.  
711 (2016). RAD Capture (Rapture): Flexible and Efficient Sequence-Based Genotyping.  
712 *Genetics*, 202(2), 389-400. doi:10.1534/genetics.115.183665
- 713 Anderson, E. C. (2010). Assessing the power of informative subsets of loci for population  
714 assignment: standard methods are upwardly biased. *Molecular Ecology Resources*, 10(4),  
715 701-710. doi:10.1111/j.1755-0998.2010.02846.x
- 716 Anderson, E. C., & Garza, J. C. (2006). The power of single-nucleotide polymorphisms for  
717 large-scale parentage inference. *Genetics*, 172(4), 2567-2582.  
718 doi:10.1534/genetics.105.048074
- 719 Baetscher, D. S., Anderson, E. C., Gilbert-Horvath, E. A., Malone, D. P., Saarman, E. T., Carr,  
720 M. H., & Garza, J. C. (2019). Dispersal of a nearshore marine fish connects marine  
721 reserves and adjacent fished areas along an open coast. *Molecular Ecology*, 28(7), 1611-  
722 1623. doi:10.1111/mec.15044



- 723 Baetscher, D. S., Clemento, A. J., Ng, T. C., Anderson, E. C., & Garza, J. C. (2018).  
724 Microhaplotypes provide increased power from short-read DNA sequences for  
725 relationship inference. *Mol Ecol Resour*, *18*(2), 296-305. doi:10.1111/1755-0998.12737
- 726 Bay, R. A., Taylor, E. B., & Schluter, D. (2019). Parallel introgression and selection on  
727 introduced alleles in a native species. *Molecular Ecology*, *28*(11), 2802-2813.  
728 doi:10.1111/mec.15097
- 729 Benita, Y., Oosting, R. S., Lok, M. C., Wise, M. J., & Humphery-Smith, I. (2003). Regionalized  
730 GC content of template DNA as a predictor of PCR success. *Nucleic Acids Research*,  
731 *31*(16), e99-e99. doi:10.1093/nar/gng101
- 732 Bradbury, I. R., Hubert, S., Higgins, B., Sharen, B., Paterson, I. G., Snelgrove, P. V. R., . . .  
733 Bentzen, P. (2011). Evaluating SNP ascertainment bias and its impact on population  
734 assignment in Atlantic cod, *Gadus morhua*. *Molecular Ecology Resources*, *11*(s1), 218-  
735 225. doi:10.1111/j.1755-0998.2010.02949.x
- 736 Brumfield, R. T., Beerli, P., Nickerson, D. A., & Edwards, S. V. (2003). The utility of single  
737 nucleotide polymorphisms in inferences of population history. *Trends in Ecology &*  
738 *Evolution*, *18*(5), 249-256. doi:[https://doi.org/10.1016/S0169-5347\(03\)00018-1](https://doi.org/10.1016/S0169-5347(03)00018-1)
- 739 Campbell, N. R., Harmon, S. A., & Narum, S. R. (2015). Genotyping-in-Thousands by  
740 sequencing (GT-seq): A cost effective SNP genotyping method based on custom  
741 amplicon sequencing. *Molecular Ecology Resources*, *15*(4), 855-867. doi:10.1111/1755-  
742 0998.12357
- 743 Catchen, J., Hohenlohe, P. A., Bassham, S., Amores, A., & Cresko, W. A. (2013). Stacks: an  
744 analysis tool set for population genomics. *Molecular Ecology*, *22*(11), 3124-3140.  
745 doi:10.1111/mec.12354
- 746 Danecek, P., Auton, A., Abecasis, G., Albers, C. A., Banks, E., DePristo, M. A., . . . Group, G. P.  
747 A. (2011). The variant call format and VCFtools. *Bioinformatics*, *27*(15), 2156-2158.  
748 doi:10.1093/bioinformatics/btr330
- 749 Davey, J. W., Hohenlohe, P. A., Etter, P. D., Boone, J. Q., Catchen, J. M., & Blaxter, M. L.  
750 (2011). Genome-wide genetic marker discovery and genotyping using next-generation  
751 sequencing. *Nature Reviews Genetics*, *12*(7), 499-510. doi:10.1038/nrg3012
- 752 Embke, H. S., Rypel, A. L., Carpenter, S. R., Sass, G. G., Ogle, D., Cichosz, T., . . . Vander  
753 Zanden, M. J. (2019). Production dynamics reveal hidden overharvest of inland  
754 recreational fisheries. *Proceedings of the National Academy of Sciences*, *116*(49), 24676.  
755 doi:10.1073/pnas.1913196116
- 756 Garza, J. C., & Freimer, N. B. (1996). Homoplasmy for size at microsatellite loci in humans and  
757 chimpanzees. *Genome Research*, *6*(3), 211-217. doi:10.1101/gr.6.3.211
- 758 Hammen, J. J., & Sloss, B. L. (2019). Walleye Genetic Characterization in the Northern Ceded  
759 Territory of Wisconsin: Implications for Stocking Using Conservation Strategies. *North*  
760 *American Journal of Fisheries Management*, *0*(0). doi:10.1002/nafm.10302
- 761 Hansen, J., Sass, G., Gaeta, J., Hansen, G., Isermann, D., Lyons, J., . . . Carpenter, S. (2015).  
762 Largemouth Bass Management in Wisconsin: Intra- and Inter-Specific Implications of  
763 Abundance Increases.
- 764 Hoffman, J. I., Simpson, F., David, P., Rijks, J. M., Kuiken, T., Thorne, M. A. S., . . .  
765 Dasmahapatra, K. K. (2014). High-throughput sequencing reveals inbreeding depression  
766 in a natural population. *Proceedings of the National Academy of Sciences*, *111*(10), 3775.  
767 doi:10.1073/pnas.1318945111

- 768 Jombart, T., & Ahmed, I. (2011). adegenet 1.3-1: new tools for the analysis of genome-wide  
769 SNP data. *Bioinformatics*, 27(21), 3070-3071. doi:10.1093/bioinformatics/btr521
- 770 Keenan, K., McGinnity, P., Cross, T. F., Crozier, W. W., & Prodöhl, P. A. (2013). diveRsity: An  
771 R package for the estimation and exploration of population genetics parameters and their  
772 associated errors. *Methods in Ecology and Evolution*, 4(8), 782-788. doi:10.1111/2041-  
773 210X.12067
- 774 Larson, W. A., Seeb, J. E., Pascal, C. E., Templin, W. D., Seeb, L. W., & Taylor, E. (2014).  
775 Single-nucleotide polymorphisms (SNPs) identified through genotyping-by-sequencing  
776 improve genetic stock identification of Chinook salmon (*Oncorhynchus tshawytscha*)  
777 from western Alaska. *Canadian Journal of Fisheries & Aquatic Sciences*, 71(5), 698-708.  
778 doi:10.1139/cjfas-2013-0502
- 779 Logsdon, D. E., Anderson, C. S., & Miller, L. M. (2016). Contribution and Performance of  
780 Stocked Walleyes in the Recovery of the Red Lakes, Minnesota, Fishery. *North  
781 American Journal of Fisheries Management*, 36(4), 828-843.  
782 doi:10.1080/02755947.2016.1167143
- 783 Luikart, G., & England, P. R. (1999). Statistical analysis of microsatellite DNA data. *Trends in  
784 Ecology & Evolution*, 14(7), 253-256. doi:10.1016/S0169-5347(99)01632-8
- 785 McKinney, G. J., Pascal, C. E., Templin, W. D., Gilk-Baumer, S. E., Dann, T. H., Seeb, L. W., &  
786 Seeb, J. E. (2019). Dense SNP panels resolve closely related Chinook salmon  
787 populations. *Canadian Journal of Fisheries and Aquatic Sciences*. doi:10.1139/cjfas-  
788 2019-0067
- 789 McKinney, G. J., Seeb, J. E., & Seeb, L. W. (2017). Managing mixed-stock fisheries: genotyping  
790 multi-SNP haplotypes increases power for genetic stock identification. *Canadian Journal  
791 of Fisheries and Aquatic Sciences*, 74(4), 429-434. doi:10.1139/cjfas-2016-0443
- 792 McKinney, G. J., Waples, R. K., Pascal, C. E., Seeb, L. W., & Seeb, J. E. (2018). Resolving  
793 allele dosage in duplicated loci using genotyping-by-sequencing data: A path forward for  
794 population genetic analysis. *Molecular Ecology Resources*, 18(3), 570-579.  
795 doi:10.1111/1755-0998.12763
- 796 McKinney, G. J., Waples, R. K., Seeb, L. W., & Seeb, J. E. (2017). Paralogs are revealed by  
797 proportion of heterozygotes and deviations in read ratios in genotyping-by-sequencing  
798 data from natural populations. *Mol Ecol Resour*, 17(4), 656-669. doi:10.1111/1755-  
799 0998.12613
- 800 Meek, M. H., & Larson, W. A. (2019). The future is now: Amplicon sequencing and sequence  
801 capture usher in the conservation genomics era. *Molecular Ecology Resources*, 19(4),  
802 795-803. doi:10.1111/1755-0998.12998
- 803 Moran, B. M., & Anderson, E. C. (2018). Bayesian inference from the conditional genetic stock  
804 identification model. *Canadian Journal of Fisheries & Aquatic Sciences*, 76(4), 551-560.  
805 doi:10.1139/cjfas-2018-0016
- 806 Morin, P. A., Luikart, G., Wayne, R. K., & the, S. N. P. w. g. (2004). SNPs in ecology, evolution  
807 and conservation. *Trends in Ecology & Evolution*, 19(4), 208-216.  
808 doi:<https://doi.org/10.1016/j.tree.2004.01.009>
- 809 Narum, S. R., Buerkle, C. A., Davey, J. W., Miller, M. R., & Hohenlohe, P. A. (2013).  
810 Genotyping-by-sequencing in ecological and conservation genomics. *Mol Ecol*, 22(11),  
811 2841-2847. doi:10.1111/mec.12350
- 812 Natesh, M., Taylor, R. W., Truelove, N. K., Hadly, E. A., Palumbi, S. R., Petrov, D. A., &  
813 Ramakrishnan, U. (2019). Empowering conservation practice with efficient and

- 814 economical genotyping from poor quality samples. *Methods in Ecology and Evolution*,  
815 10(6), 853-859. doi:10.1111/2041-210X.13173
- 816 Navajas, M. J., Thistlewood, H. M. A., Lagnel, J., & Hughes, C. (1998). Microsatellite  
817 sequences are under-represented in two mite genomes. *Insect Molecular Biology*, 7(3),  
818 249-256. doi:10.1111/j.1365-2583.1998.00066.x
- 819 Pavinato, V. A. C., Wijeratne, S., Spacht, D., Denlinger, D. L., Meulia, T., & Michel, A. P.  
820 (2019). Leveraging targeted sequencing for non-model species: a step-by-step guide to  
821 obtain a reduced SNP set and a pipeline to automate data processing in the Antarctic  
822 Midge, <em>Belgica antarctica</em>. *bioRxiv*, 772384. doi:10.1101/772384
- 823 Reid, K., Carlos Garza, J., Gephard, S. R., Caccone, A., Post, D. M., & Palkovacs, E. P. (2019).  
824 Restoration-mediated secondary contact leads to introgression of alewife ecotypes  
825 separated by a colonial-era dam. *Evolutionary Applications*, n/a(n/a).  
826 doi:10.1111/eva.12890
- 827 Rochette, N. C., Rivera-Colón, A. G., & Catchen, J. M. (2019). Stacks 2: Analytical methods for  
828 paired-end sequencing improve RADseq-based population genomics. *Molecular Ecology*,  
829 28(21), 4737-4754. doi:10.1111/mec.15253
- 830 Rychlik, W. (1993). Selection of Primers for Polymerase Chain Reaction. In B. A. White (Ed.),  
831 *PCR Protocols: Current Methods and Applications* (pp. 31-40). Totowa, NJ: Humana  
832 Press.
- 833 Rypel, A. L., Goto, D., Sass, G. G., & Zanden, M. J. V. (2018). Eroding productivity of walleye  
834 populations in northern Wisconsin lakes. *Canadian Journal of Fisheries and Aquatic  
835 Sciences*, 75, 2291+.
- 836 Schmidt, D., Campbell, N. R., Govindarajulu, P., Larsen, K. W., & Russello, M. A. (2019).  
837 Genotyping-in-Thousands by sequencing (GT-seq) panel development and application to  
838 minimally-invasive DNA samples to support studies in molecular ecology. *Molecular  
839 Ecology Resources*, 0(ja). doi:10.1111/1755-0998.13090
- 840 Seeb, J. E., Carvalho, G., Hauser, L., Naish, K., Roberts, S., & Seeb, L. W. (2011). Single-  
841 nucleotide polymorphism (SNP) discovery and applications of SNP genotyping in  
842 nonmodel organisms. *Molecular Ecology Resources*, 11, 1-8. doi:10.1111/j.1755-  
843 0998.2010.02979.x
- 844 Singh, U. A., Kumari, M., & Iyengar, S. (2018). Method for improving the quality of genomic  
845 DNA obtained from minute quantities of tissue and blood samples using Chelex 100  
846 resin. *Biological Procedures Online*, 20.
- 847 Smith, C. T., Antonovich, A., Templin, W. D., Elfstrom, C. M., Narum, S. R., & Seeb, L. W.  
848 (2007). Impacts of Marker Class Bias Relative to Locus-Specific Variability on  
849 Population Inferences in Chinook Salmon: A Comparison of Single-Nucleotide  
850 Polymorphisms with Short Tandem Repeats and Allozymes. *Transactions of the  
851 American Fisheries Society*, 136(6), 1674-1687. doi:10.1577/T06-227.1
- 852 Stepien, C., A., Murphy, D., J., Lohner, R., N., Sepulveda-Villet O, J., & Haponski, A., E.  
853 (2009). Signatures of vicariance, postglacial dispersal and spawning philopatry:  
854 population genetics of the walleye Sander vitreus. *Molecular Ecology*, 18(16), 3411-  
855 3428. doi:10.1111/j.1365-294X.2009.04291.x
- 856 Storer, C. G., Pascal, C. E., Roberts, S. B., Templin, W. D., Seeb, L. W., & Seeb, J. E. (2012).  
857 Rank and Order: Evaluating the Performance of SNPs for Individual Assignment in a  
858 Non-Model Organism. *PLOS ONE*, 7(11), 1-13. doi:10.1371/journal.pone.0049018

- 859 Wagner, C. E., Keller, I., Wittwer, S., Selz, O. M., Mwaiko, S., Greuter, L., . . . Seehausen, O.  
860 (2013). Genome-wide RAD sequence data provide unprecedented resolution of species  
861 boundaries and relationships in the Lake Victoria cichlid adaptive radiation. *Molecular*  
862 *Ecology*, 22(3), 787-798. doi:10.1111/mec.12023
- 863 Westbrook, L. J. (2012). *Genetic structure of rock bass and johnny darters: Implications for*  
864 *gamefish management in Wisconsin*. (Master's), University of Wisconsin, Stevens Point,
- 865 Willi, Y., van Kleunen, M., Dietrich, S., & Fischer, M. (2007). Genetic rescue persists beyond  
866 first-generation outbreeding in small populations of a rare plant. *Proceedings of the Royal*  
867 *Society B: Biological Sciences*, 274(1623), 2357-2364. doi:10.1098/rspb.2007.0768

#### 868 **Data accessibility**

869 Raw data for the RADseq and GT-seq data obtained in this study was deposited to the NCBI  
870 sequence read archive (SUB####) and VCF files of genotypes are available on DRYAD (DOI:  
871 PENDING). Python and R scripts used in the statistical analysis pipeline are available at GIT

#### 872 **Author contributions**

873 WL, GS, KG, and LM designed the study with input from MB. Data analyses were conducted by  
874 MB with assistance from GM. Laboratory analysis was conducted by MB, KG, and LS. All  
875 authors contributed to the writing of the manuscript.

876 **Tables**

877 **Table 1.** Information on walleye *Sander vitreus* collections from 23 sites in Wisconsin and  
 878 Minnesota. Reporting units are aggregations of genetically similar populations grouped for GSI  
 879 analysis, n past filters is the number of individuals missing genotypes at < 30% of SNPs and  
 880 retained after quality filtering. Diversity statistics calculated using 20,579 SNPs. The  $F_{ST\_600}$ ,  
 881 Composite<sub>600</sub>, and Diversity<sub>600</sub> columns are the percent correct assignment to reporting group  
 882 for each population with 100% simulations conducted using the corresponding panel.

883

| Population ID | Reporting Unit               | Population              | Latitude | Longitude | n sampled | n past filters | $H_i$ | $H_o$ | $F_{is}$ | AR    | $F_{ST\_600}$ | Composite <sub>600</sub> | Diversity <sub>600</sub> |
|---------------|------------------------------|-------------------------|----------|-----------|-----------|----------------|-------|-------|----------|-------|---------------|--------------------------|--------------------------|
| 1             | Rock-Fox                     | Delavan Lake            | 42.58    | -88.63    | 48        | 48             | 0.169 | 0.168 | 0.008    | 1.607 | 1.00          | 1.00                     | 1.00                     |
| 2             | Wolf River                   | Lake Winnebago          | 44.36    | -88.69    | 47        | 41             | 0.173 | 0.186 | -0.05    | 1.645 | 1.00          | 1.00                     | 1.00                     |
| 3             | Upper Wisconsin              | Lake Wisconsin          | 43.38    | -89.58    | 48        | 45             | 0.179 | 0.175 | 0.017    | 1.674 | 1.00          | 1.00                     | 1.00                     |
| 4             | Upper Wisconsin              | Medicine Lake Chain     | 45.81    | -89.13    | 47        | 47             | 0.166 | 0.166 | 0.004    | 1.604 | 0.96          | 0.98                     | 0.98                     |
| 5             | Upper Wisconsin              | Willow Flowage          | 45.71    | -89.87    | 48        | 48             | 0.176 | 0.174 | 0.013    | 1.657 | 1.00          | 1.00                     | 0.99                     |
| 6             | Upper Wisconsin              | Kawaguesaga Lake        | 45.86    | -89.74    | 48        | 42             | 0.17  | 0.167 | 0.013    | 1.638 | 0.96          | 0.94                     | 0.94                     |
| 7             | Upper Wisconsin              | Big Arbor Vitae Lake    | 45.93    | -89.65    | 48        | 44             | 0.174 | 0.174 | 0.005    | 1.654 | 0.74          | 0.96                     | 0.99                     |
| 8             | Upper Chippewa               | Escanaba Lake           | 46.06    | -89.59    | 48        | 44             | 0.168 | 0.173 | -0.018   | 1.623 | NA            | NA                       | NA                       |
| 9             | Upper Chippewa               | Sanford Lake            | 46.18    | -89.69    | 48        | 44             | 0.157 | 0.164 | -0.033   | 1.528 | NA            | NA                       | NA                       |
| 10            | Upper Chippewa               | Manitowish Lake         | 46.11    | -89.85    | 47        | 35             | 0.172 | 0.175 | -0.006   | 1.647 | 0.58          | 0.57                     | 0.51                     |
| 11            | Upper Chippewa               | Turtle Flambeau Flowage | 46.06    | -90.13    | 47        | 38             | 0.173 | 0.172 | 0.005    | 1.661 | 0.63          | 0.55                     | 0.76                     |
| 12            | Upper Chippewa               | Chippewa Flowage        | 45.90    | -91.09    | 47        | 43             | 0.173 | 0.175 | -0.006   | 1.658 | 0.88          | 0.89                     | 0.93                     |
| 13            | Upper Chippewa               | Eau Claire River        | 44.80    | -91.50    | 47        | 47             | 0.161 | 0.162 | -0.001   | 1.583 | 0.98          | 0.98                     | 0.98                     |
| 14            | Upper Chippewa               | Lake Millicent          | 46.53    | -91.37    | 48        | 32             | 0.167 | 0.176 | -0.034   | 1.623 | NA            | NA                       | NA                       |
| 15            | Lake Superior                | St. Louis River         | 46.65    | -92.21    | 32        | 30             | 0.17  | 0.168 | 0.006    | 1.621 | 0.77          | 0.77                     | 0.77                     |
| 16            | Vermilion River              | Pike River              | 47.59    | -92.39    | 32        | 28             | 0.144 | 0.142 | 0.005    | 1.498 | 1.00          | 1.00                     | 1.00                     |
| 17            | Des Moines River             | Lake Sarah              | 44.15    | -95.77    | 32        | 30             | 0.164 | 0.166 | -0.006   | 1.597 | 1.00          | 1.00                     | 1.00                     |
| 18            | North Fork Crow River        | Lake Koronis            | 45.33    | -94.70    | 32        | 17             | 0.155 | 0.155 | -0.011   | 1.579 | 0.82          | 0.82                     | 0.75                     |
| 19            | Rum River                    | Mille Laes Lake         | 46.25    | -93.67    | 32        | 29             | 0.148 | 0.151 | -0.018   | 1.511 | 1.00          | 1.00                     | 1.00                     |
| 20            | Pine River                   | Pine River              | 46.70    | -94.39    | 32        | 30             | 0.156 | 0.162 | -0.028   | 1.547 | 0.97          | 0.97                     | 0.97                     |
| 21            | Mississippi River Headwaters | Cutfoot Sioux Lake      | 47.50    | -94.09    | 32        | 25             | 0.147 | 0.148 | -0.011   | 1.517 | 1.00          | 1.00                     | 1.00                     |
| 22            | Otter Tail River             | Otertail Lake           | 46.41    | -95.66    | 32        | 23             | 0.158 | 0.16  | -0.016   | 1.568 | 1.00          | 1.00                     | 0.97                     |
| 23            | Red Lake                     | Red Lake                | 47.91    | -95.04    | 32        | 29             | 0.149 | 0.153 | -0.025   | 1.514 | 0.90          | 0.86                     | 0.83                     |

884

885

886

887 **Table 2.** Summary of pairwise  $F_{ST}$  comparisons between walleye *Sander vitreus* populations  
888 grouped by state of origin. Abbreviations are Wisconsin (WI) and Minnesota (MN).

|      | WI-<br>WI | MN-<br>MN | WI-<br>MN |
|------|-----------|-----------|-----------|
| Max  | 0.106     | 0.142     | 0.142     |
| Mean | 0.032     | 0.068     | 0.072     |
| Min  | 0.001     | 0.019     | 0.026     |

889

890

891 **Table 3.** Summary statistics by SNP panel tested for walleye *Sander vitreus* in Wisconsin and  
892 Minnesota, USA, including: average  $F_{ST}$ , heterozygosity ( $H_{E\_mhap}$ ), assignment accuracy to  
893 population and reporting unit of origin in 100% simulations, and estimated false-positive rates  
894 (FPR) for a given kin relationship at a false-negative rate (FNR) of 0.01.

895

|                                    | $F_{ST\_600}$          | Composite <sub>600</sub> | Diversity <sub>600</sub> |
|------------------------------------|------------------------|--------------------------|--------------------------|
| Average $F_{ST}$                   | 0.117                  | 0.076                    | 0.047                    |
| Average $H_{E\_mhap}$              | 0.389                  | 0.569                    | 0.633                    |
| Average accuracy by reporting unit | 0.937                  | 0.937                    | 0.929                    |
| Average accuracy by population     | 0.864                  | 0.861                    | 0.862                    |
| Parent-offspring FPR (FNR = 0.01)  | $4.68 \times 10^{-34}$ | $7.92 \times 10^{-62}$   | $2.74 \times 10^{-80}$   |
| Full-sibling FPR (FNR = 0.01)      | $3.42 \times 10^{-29}$ | $5.34 \times 10^{-50}$   | $1.16 \times 10^{-64}$   |
| Half-sibling FPR (FNR = 0.01)      | $6.44 \times 10^{-6}$  | $2.56 \times 10^{-10}$   | $2.06 \times 10^{-13}$   |

896

897

898 **Table 4.** Summary of GT-seq optimization runs for walleye *Sander vitreus* in Wisconsin and  
899 Minnesota, USA. Rows report number of primer pairs targeted, number of reads with intact i-7  
900 barcodes (retained reads), number of retained reads with *in-silico* primer sequences (total reads),  
901 number of total reads with *in-silico* probe sequences (on-target reads), percent of total reads on-  
902 target, percent of total reads allocated to the 10% of loci tested with highest rank total read  
903 counts, average number of SNPs per locus, and average GC content in the forward and reverse  
904 primers.

|                                           | Test 1    | Test 2     | Test 3    |
|-------------------------------------------|-----------|------------|-----------|
| Total primer pairs                        | 600       | 477        | 436       |
| i7 reads                                  | 4,655,071 | 12,653,262 | 7,282,101 |
| i7 reads w/ primers (total reads)         | 4,150,910 | 9,347,591  | 6,827,424 |
| i7 reads w/ primers & probes (on- target) | 1,031,707 | 3,268,293  | 6,262,523 |
| On-target percent of total reads          | 24.9%     | 35.0%      | 91.7%     |
| Percent reads in top 10% of loci          | 85.0%     | 72.5%      | 36.6%     |
| mean SNPs per locus                       | 2.06      | 2.00       | 1.97      |
| mean GC percent forward primer            | 51.0%     | 50.4%      | 50.3%     |
| mean GC percent reverse primer            | 49.0%     | 48.3%      | 48.2%     |
| mean $F_{ST}$                             | 0.133     | 0.133      | 0.133     |
| mean $H_{E\_mhap}$                        | 0.425     | 0.415      | 0.416     |

905

906



907 **Figures**

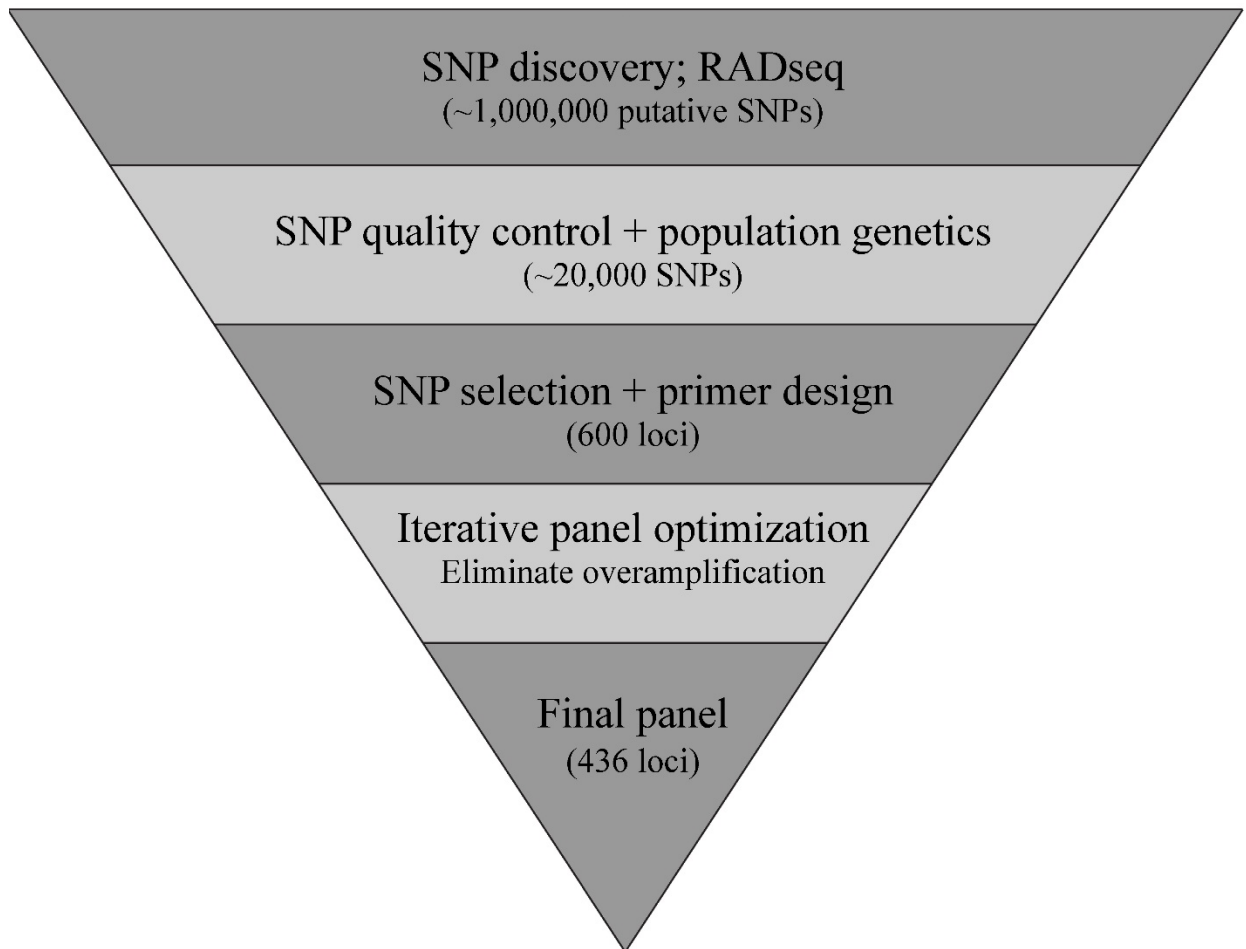

908

909 **Figure 1.** Generalized workflow describing major steps inherent to *de novo* construction of a  
910 high-density SNP panel for walleye *Sander vitreus* in Wisconsin and Minnesota, USA. Numbers  
911 of SNPs or loci present in each phase for this panel shown in parentheses.

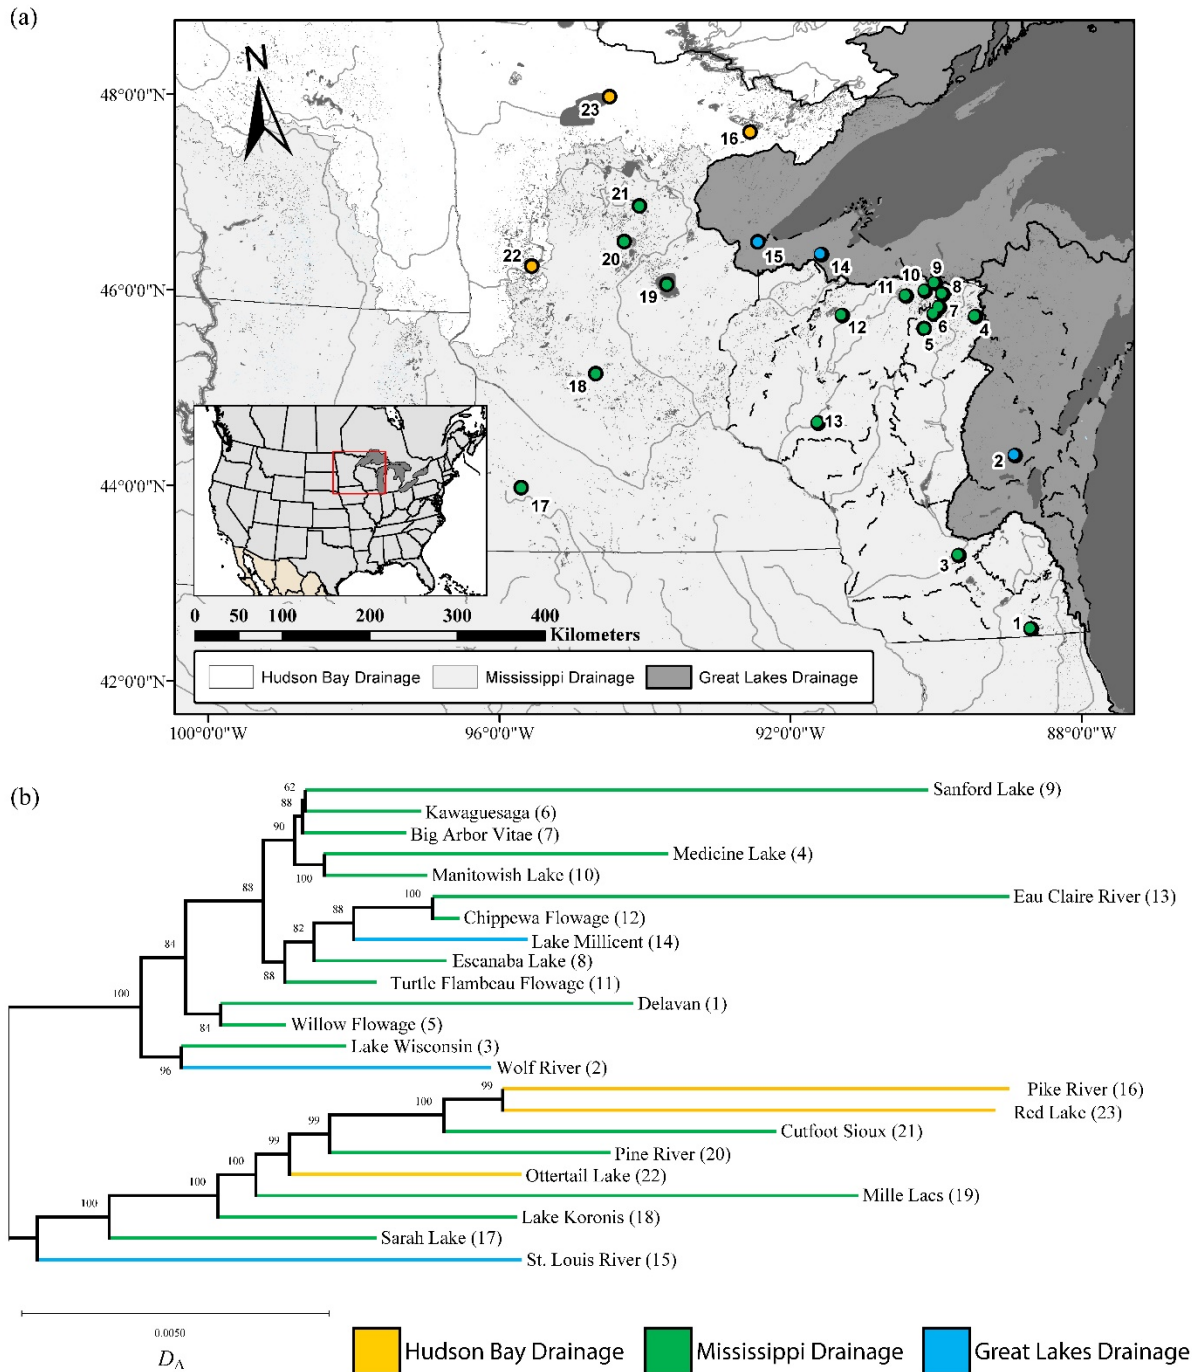

912

913 **Figure 2.** (a) Map of walleye *Sander vitreus* in Wisconsin (populations 1-14), the St. Louis River  
 914 (population 15), and Minnesota (populations 16-23), USA, collection locations and (b)  
 915 dendrogram of sampled populations with bootstrap support ( $n = 1000$ ) estimates above nodes.  
 916 Branch lengths correspond to genetic distances estimated using Nei's  $D_A$ . Figures color coded  
 917 according to major drainage of origin (Hudson Bay: yellow, Mississippi: green, Great Lakes:  
 918 blue) and numbered with respect to order in Table 1.

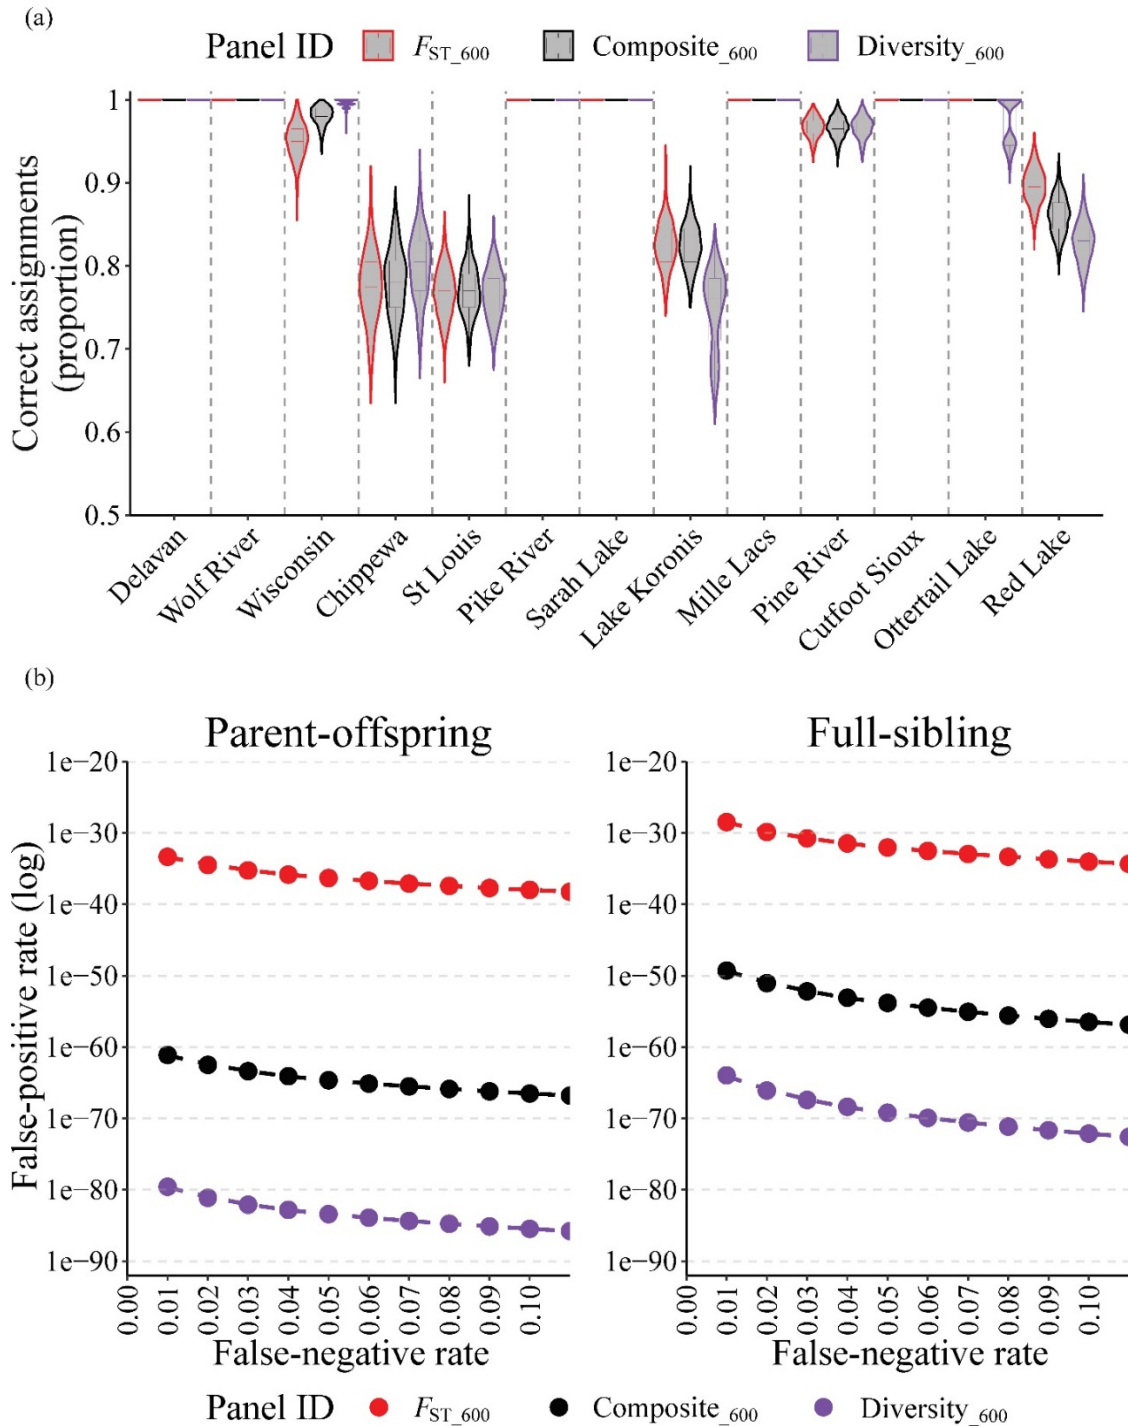

919

920 **Figure 3.** (a) Violin plots showing density distributions of accuracy estimates from 100%  
 921 simulations of 23 populations of walleye *Sander vitreus* in Wisconsin and Minnesota, USA,  
 922 performed using 1,000 iterations for each test panel by reporting unit and (b) simulated false-  
 923 positive rate (FPR) estimates across a range of false-negative rates (FNR). Figures color coded  
 924 according to SNP panel tested:  $F_{ST\_600}$  (red, 600 rank  $F_{ST}$  loci), Composite<sub>600</sub> (black, 300 rank  
 925  $F_{ST}$  and 300 rank  $H_{E\_mhap}$  loci), and Diversity<sub>600</sub> (purple, 600 rank  $H_{E\_mhap}$  loci).

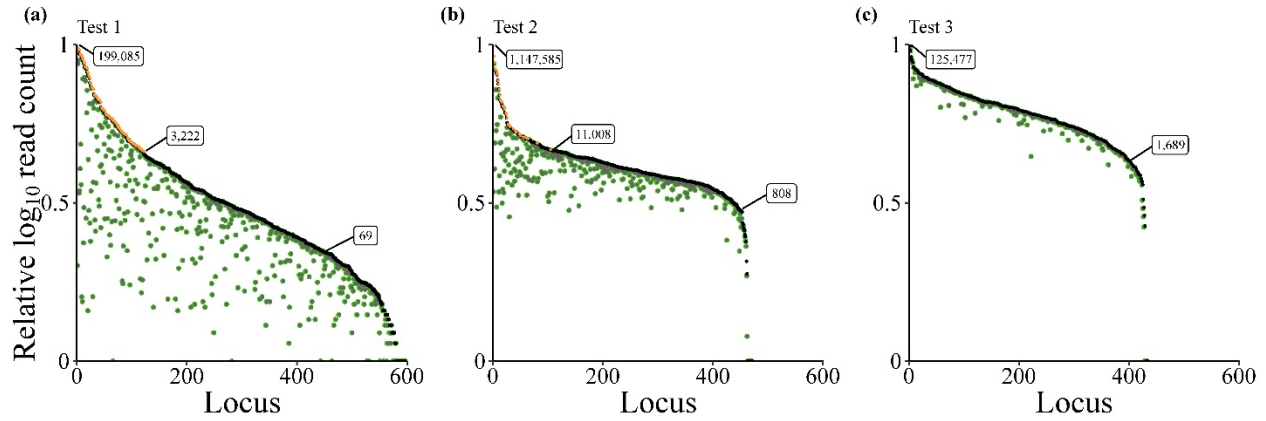

926

927 **Figure 4.** Relative  $\log_{10}$  total read counts per locus (black) and relative  $\log_{10}$  on-target  
928 read counts per locus (green) of the GT-seq panel for walleye *Sander vitreus* in Wisconsin and  
929 Minnesota, USA, prior to optimization (a, 600 loci), after first optimization (b, 477 loci), and  
930 after second optimization (c, 436 loci). Loci identified for culling during optimization steps  
931 shown in orange. Raw read counts annotated in boxes.

932

933

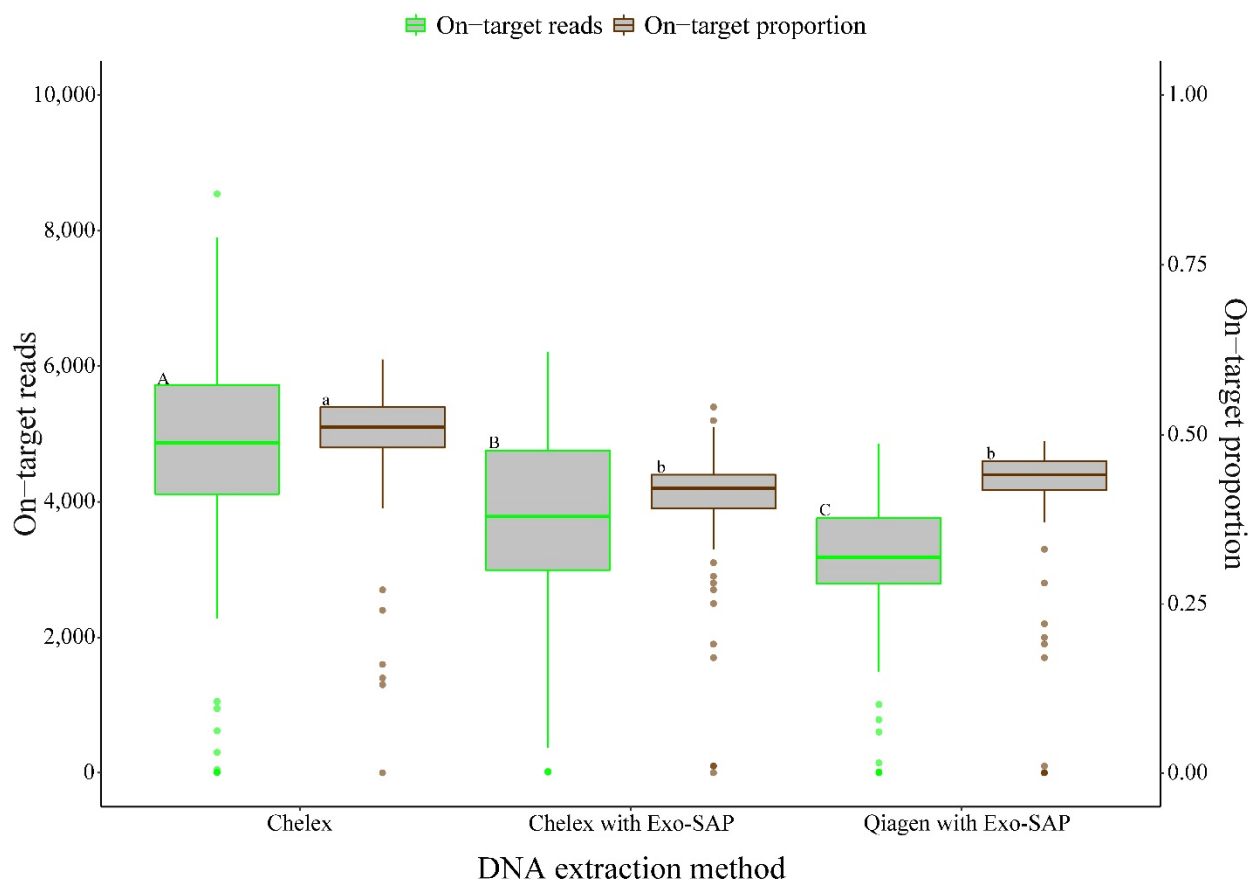

934

935 **Figure 5.** Number of on-target reads (green) and proportion of total reads on-target obtained  
936 from GT-seq libraries produced using DNAs extracted via Chelex, Chelex with Exo-SAP, and  
937 Qiagen with Exo-SAP. Significantly different groups denoted by letters on box.

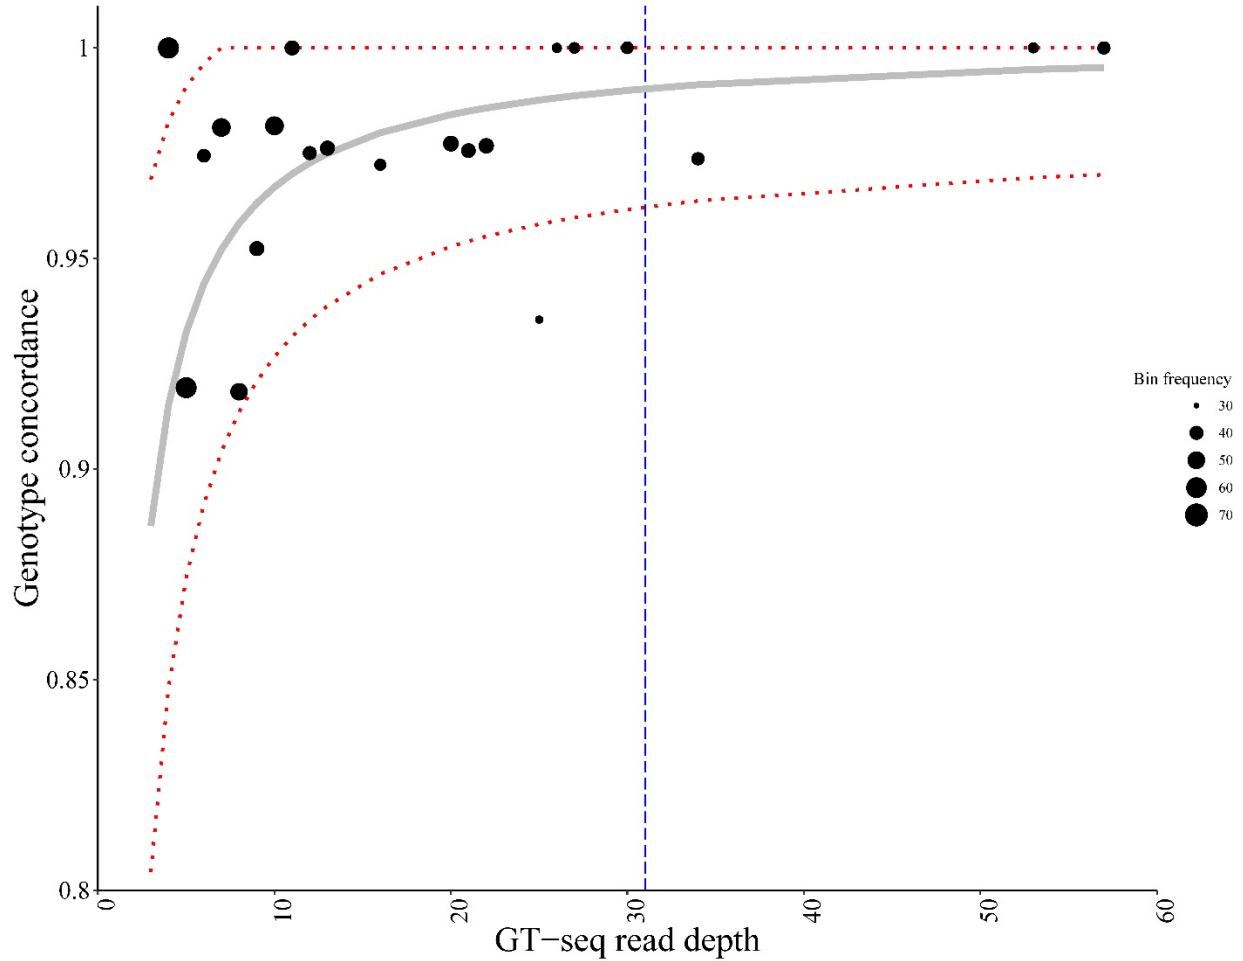

938

939 **Figure 6.** Modeled relationship between GT-seq read depth and genotype concordance between  
940 GT-seq and RADseq shown in gray ( $1.00-0.34/\text{GT-seq read depth}$ ,  $r_{ss} = 0.02$ ) with 95%  
941 confidence intervals in red. GT-seq read depth at which estimated genotype concordance equals  
942 99% (96.2%-100%) represented by blue line. Black points display proportion of genotypes found  
943 identical between GT-seq and RADseq for GT-seq read depth bins with > 30 genotypes.

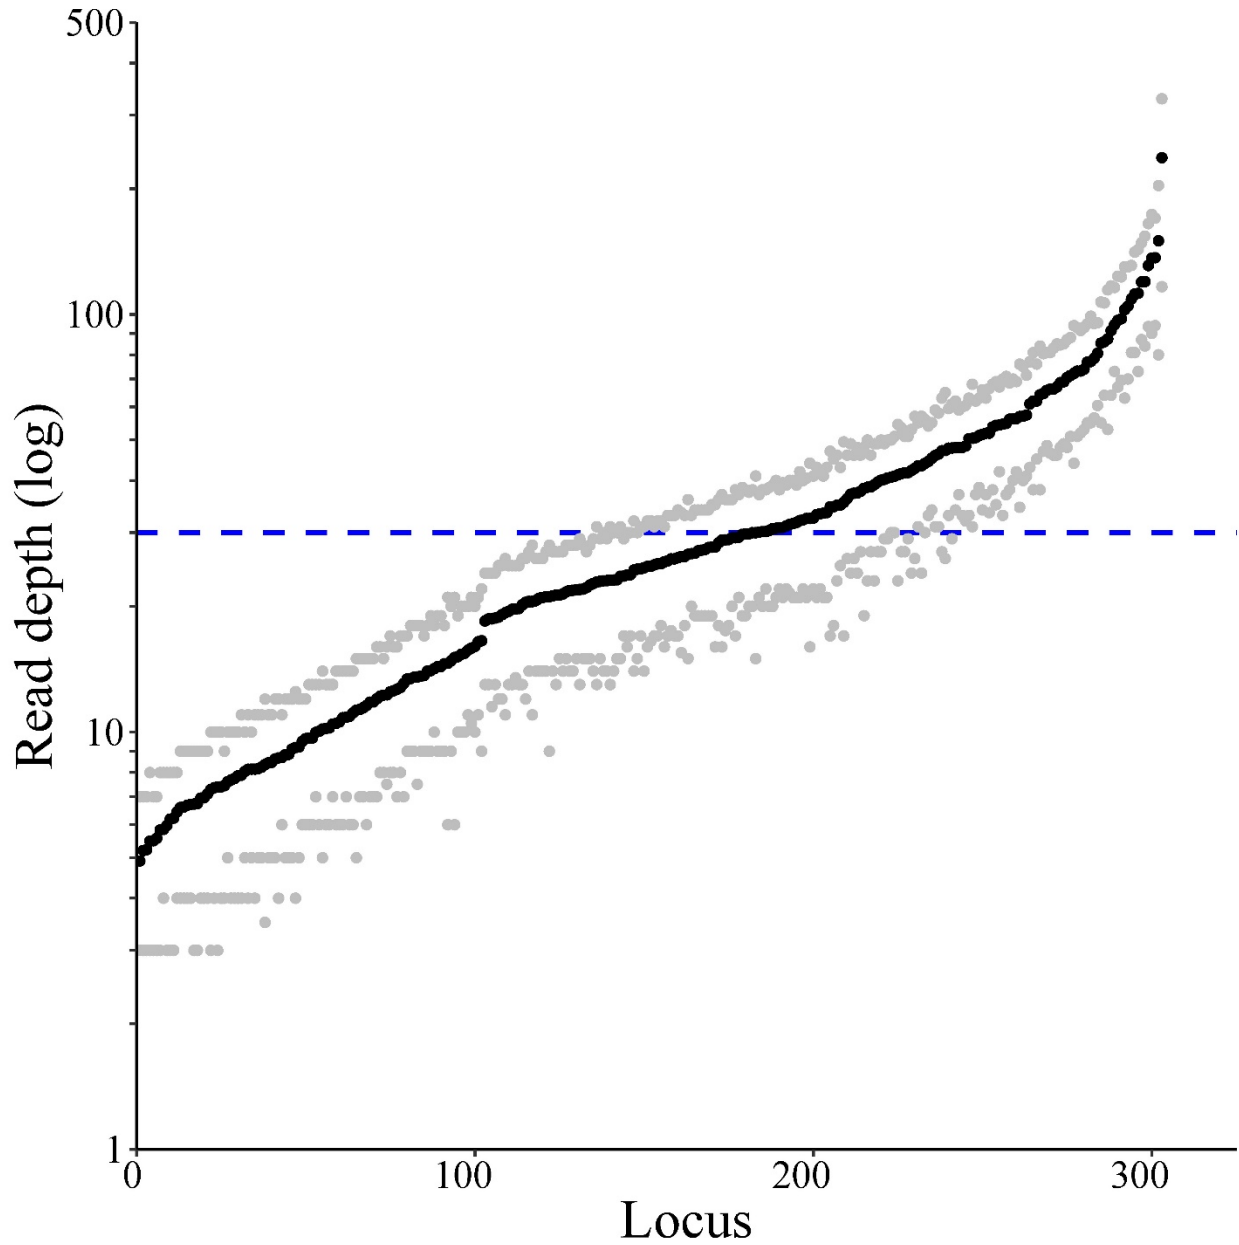

944

945 **Figure 7.** Variation in read depth among individuals at loci successfully genotyped after quality  
946 filtering (303 loci with < 30% missing data). Average read depth at each locus shown with black  
947 points, while gray points denote first and third quartile for each locus. Dotted blue line denotes  
948 target read depth of 30 $\times$ . Data from 551 walleye sequenced using fully optimized panel. Average  
949 read depth among all loci is 33 $\times$ .

950

## 951 **Supplementary materials**

952 **Table S1.** Pairwise  $F_{ST}$  estimates for all sampled walleye *Sander vitreus* populations (sites  
953 numbered according to Table 1 and Fig. 1 A). Estimates produced in arlequin v3.5.2.

954 **Table S2.** Summary statistics for 20,597 SNPs retained through initial filtering based on  
955 maximum missingness rates of < 30% and HDplot cutoffs of  $H > 0.5$  and  $-7 < D < 7$ . Columns  
956 include a locus tag (CHROM), position of SNP within locus (Reid et al.), a unique SNP value  
957 (ID), reference (REF) and alternate (Keenan et al.) SNP alleles, global  $F_{IS}$  (Willi et al.), single  
958 SNP  $F_{ST}$  (Smith et al.), expected microhaplotype heterozygosity (mhap\_He), and number of  
959 alleles per locus tag (n\_alleles). Diversity statistics estimated in diveRsity v1.9.90 (global  $F_{IS}$  and  
960 single SNP  $F_{ST}$ ) and adegenet v2.1.1 (single locus  $H_E$ , number of alleles).

961 **Table S3.** Summary matrix of 100% simulations (reps = 1,000, mixsize = 200) for each sampled  
962 population retained through filtering, performed using the  $F_{ST\_600}$  panel. Each row represents a  
963 simulation for the listed population name. Each column within a row represents the proportion of  
964 individuals assigned to the population denoted at the top of the column. Unassigned individuals  
965 (< 70% probability of origin from a given population) accounted for in last column.

966 **Table S4.** Summary matrix of 100% simulations (reps = 1,000, mixsize = 200) for each sampled  
967 population retained through filtering steps, performed using the Composite\_600 panel. Each row  
968 represents a simulation for the listed population name. Each column within a row represents the  
969 proportion of individuals assigned to the population denoted at the top of the column.  
970 Unassigned individuals (< 70% probability of origin from a given population) are accounted for  
971 in the last column.

972 **Table S5.** Summary matrix of 100% simulations (reps = 1,000, mixsize = 200) for each sampled  
973 population retained through filtering steps, performed using the Diversity\_600 panel. Each row  
974 represents a simulation for the listed population name. Each column within a row represents the  
975 proportion of individuals assigned to the population denoted at the top of the column.  
976 Unassigned individuals (< 70% probability of origin from a given population) are accounted for  
977 in the last column.



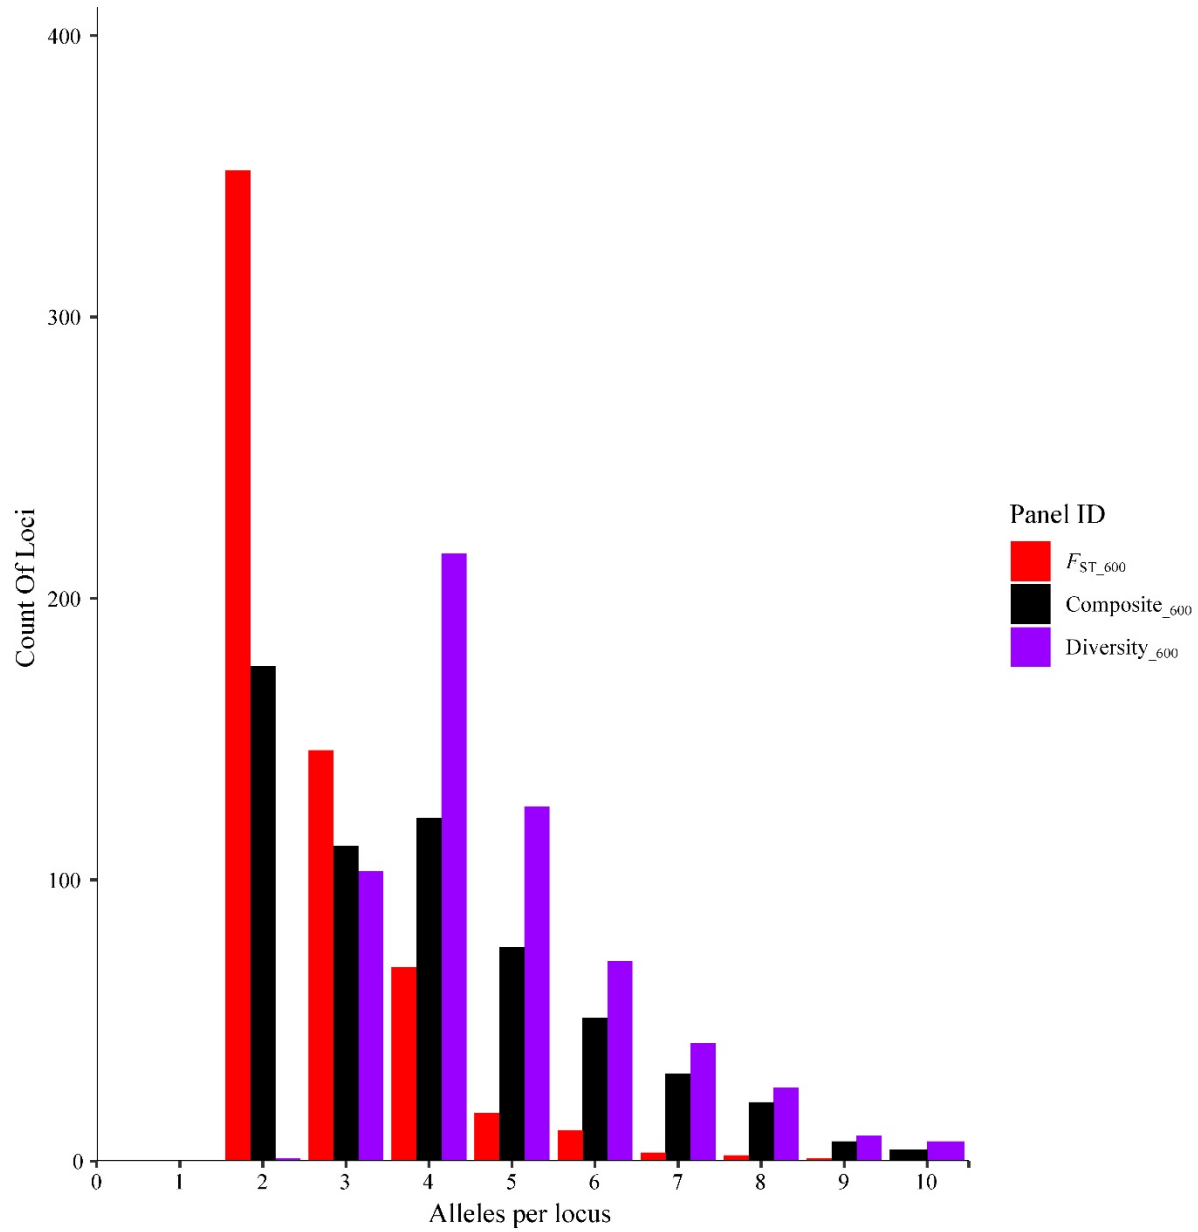

978

979 **Figure S1.** Frequency distribution of number of alleles among 600 loci tested in each panel.
